# Supplementary material for: In-depth plasma proteomics reveals increase in circulating PD-1 during anti-PD-1 immunotherapy in patients with metastatic cutaneous melanoma
Source: J Immunother Cancer. 2020 May 20;8(1):e000204. doi: 10.1136/jitc-2019-000204 (PMC7253007; doi:10.1136/jitc-2019-000204)
Supplement: Supplementary data [file jitc-2019-000204supp002.xlsx]

## Sheet: Overview
Additional File 2
	Supplementary tables for study:
	In-depth plasma proteomics reveals increase in circulating PD-1 during anti-PD-1 immunotherapy in patients with metastatic cutaneous melanoma.
	Haris Babačić, Janne Lehtiö, Yago Pico de Coaña, Maria Pernemalm, Hanna Eriksson. 2020
	The following sheets contain the following tables:
		Table S0. All proteins analysed with PEA.
		Table S1. Patient and clinical characteristics of all patients with metastatic cutaneous melanoma receiving immune checkpoint inhibitors (ICIs) or MAP-kinase inhibitors (MAPKis) as first-line treatment.
		Table S2. Change in plasma levels during treatment with anti-PD-1 immune checkpoint inhibitors analysed with HiRIEF LC-MS/MS.
		Table S3. Change in plasma levels during treatment with anti-PD-1 immune checkpoint inhibitors analysed with PEA.
		Table S4. Change in protein plasma levels in the anti-PD-1 immune checkpoint inhibitor subgroup of responders, HiRIEF LC-MS/MS.
		Table S5. Change in protein plasma levels in the anti-PD-1 immune checkpoint inhibitor subgroup of non-responders, HiRIEF LC-MS/MS.
		Table S6. Protein with differentially altered plasma levels in the anti-PD-1 immune checkpoint inhibitor subgroup of responders as compared to the subgroup of anti-PD-1 non-responders, HiRIEF LC-MS/MS.
		Table S7. Change in protein plasma levels in the anti-PD-1 immune checkpoint inhibitor subgroup of responders, PEA.
		Table S8. All proteins whose pre-treatment (pre-trm) plasma levels had an association with PFS in the anti-PD-1 immune checkpoint inhibitor cohort, analysed with HiRIEF LC-MS/MS.
		Table S9. All proteins whose pre-treatment (pre-trm) plasma levels had an association with PFS in the anti-PD-1 immune checkpoint inhibitor cohort, analysed with HiRIEF LC-MS/MS, multivariate Cox models.
		Table S10. Overlap of proteins in PEA data whose pre-treatment (pre-trm) plasma levels had an association with progression free survival in the immune checkpoint inhibitor and MAPK-inhibitors cohort.
		Table S11. All proteins whose pre-treatment (pre-trm) plasma levels had an association with PFS in the immune checkpoint inhibitor cohort (anti-PD-1 and anti-CTLA-4), analysed with PEA, multivariate Cox models.
		Table S12. All proteins whose log2-fold change (log2-FC) had an association with PFS in the anti-PD-1 immune checkpoint inhibitor cohort, analysed with HiRIEF LC-MS/MS, multivariate Cox models.
		Table S13. All proteins whose log2-fold change (log2-FC) had an association with PFS in the immune checkpoint inhibitor cohort (anti-PD-1 and anti-CTLA-4), analysed with PEA, multivariate Cox models.

## Sheet: Table S0
Table S0. All proteins analysed with PEA.
	NA = missing values. The proteins labelled in red were not included in the main analysis due to insufficient observations.
	Protein target	UniProt No.	Gene ID	NA < 20%	Included
	Adenosine deaminase	P00813	ADA	Yes	Yes
	Adhesion G-protein coupled receptor G1	Q9Y653	ADGRG1	Yes	Yes
	Angiopoetin-1 receptor	Q02763	TEK	Yes	Yes
	Angiopoietin-1	Q15389	ANGPT1	Yes	Yes
	Angiopoietin-2	O15123	ANGPT2	Yes	Yes
	Arginase-1	P05089	ARG1	No	No
	C-C motif chemokine 13	Q99616	CCL13	Yes	Yes
	C-C motif chemokine 17	Q92583	CCL17	Yes	Yes
	C-C motif chemokine 19	Q99731	CCL19	Yes	Yes
	C-C motif chemokine 2	P13500	CCL2	Yes	Yes
	C-C motif chemokine 20	P78556	CCL20	Yes	Yes
	C-C motif chemokine 23	P55773	CCL23	Yes	Yes
	C-C motif chemokine 3	P10147	CCL3	Yes	Yes
	C-C motif chemokine 4	P13236	CCL4	Yes	Yes
	C-C motif chemokine 7	P80098	CCL7	Yes	Yes
	C-C motif chemokine 8	P80075	CCL8	Yes	Yes
	C-X-C motif chemokine 1	P09341	CXCL1	Yes	Yes
	C-X-C motif chemokine 10	P02778	CXCL10	Yes	Yes
	C-X-C motif chemokine 11	O14625	CXCL11	Yes	Yes
	C-X-C motif chemokine 13	O43927	CXCL13	Yes	Yes
	C-X-C motif chemokine 5	P42830	CXCL5	Yes	Yes
	C-X-C motif chemokine 9	Q07325	CXCL9	Yes	Yes
	Carbonic anhydrase 9	Q16790	CA9	Yes	Yes
	Caspase-8	Q14790	CASP8	Yes	Yes
	CD27 antigen	P26842	CD27	Yes	Yes
	CD40 ligand	P29965	CD40LG	Yes	Yes
	CD40L receptor	P25942	CD40	Yes	Yes
	CD70 antigen	P32970	CD70	Yes	Yes
	CD83 antigen	Q01151	CD83	Yes	Yes
	Cytotoxic and regulatory T-cell molecule	O95727	CRTAM	Yes	Yes
	Decorin	P07585	DCN	Yes	Yes
	Fas antigen ligand	P48023	FASLG	Yes	Yes
	Fibroblast growth factor 2	P09038	FGF2	No	No
	Fractalkine	P78423	CX3CL1	Yes	Yes
	Galectin-1	P09382	LGALS1	Yes	Yes
	Galectin-9	O00182	LGALS9	Yes	Yes
	Granzyme A	P12544	GZMA	Yes	Yes
	Granzyme B	P10144	GZMB	Yes	Yes
	Granzyme H	P20718	GZMH	Yes	Yes
	Heme oxygenase 1	P09601	HMOX1	Yes	Yes
	Hepatocyte growth factor	P14210	HGF	Yes	Yes
	ICOS ligand	O75144	ICOSLG	Yes	Yes
	Interferon beta	P01574	IFNB1	No	No
	Interferon gamma	P01579	IFNG	No	No
	Interleukin-1 alpha	P01583	IL1A	No	No
	Interleukin-10	P22301	IL10	Yes	Yes
	Interleukin-12	P29459, P29460	IL12A/IL12B	Yes	Yes
	Interleukin-12 receptor subunit beta-1	P42701	IL12RB1	Yes	Yes
	Interleukin-13	P35225	IL13	No	No
	Interleukin-18	Q14116	IL18	Yes	Yes
	Interleukin-2	P60568	IL2	No	No
	Interleukin-21	Q9HBE4	IL21	No	No
	Interleukin-33	O95760	IL33	No	No
	Interleukin-35	Q14213, P29459	IL12A/EBI3	No	No
	Interleukin-4	P05112	IL4	No	No
	Interleukin-5	P05113	IL5	No	No
	Interleukin-6	P05231	IL6	Yes	Yes
	Interleukin-7	P13232	IL7	Yes	Yes
	Interleukin-8	P10145	CXCL8	Yes	Yes
	Latency-associated peptide
	transforming growth factor beta-1	P01137	TGFB1	Yes	Yes
	Lysosome-associated membrane glycoprotein 3 Q	Q9UQV4	LAMP3	Yes	Yes
	Macrophage colony-stimulating factor 1	P09603	CSF1	Yes	Yes
	Macrophage metalloproteinase-12	P39900	MMP12	Yes	Yes
	Matrix metalloproteinase-7	P09237	MMP7	Yes	Yes
	MHC class I polypeptide-related sequence A/B	Q29983, Q29980	MICA/MICB	Yes	Yes
	Natural cytotoxicity triggering receptor 1	O76036	NCR1	Yes	Yes
	Natural killer cells antigen CD94	Q13241	KLRD1	Yes	Yes
	Nitric oxide synthase, endothelial	P29474	NOS3	No	No
	Placenta growth factor	P49763	PGF	Yes	Yes
	Platelet-derived growth factor subunit B P	P01127	PDGFB	Yes	Yes
	Pleiotropin	P21246	PTN	Yes	Yes
	Pro-epidermal growth factor	P01133	EGF	Yes	Yes
	Programmed cell death 1 ligand 1	Q9NZQ7	CD274	Yes	Yes
	Programmed cell death 1 ligand 2	Q9BQ51	PDCD1LG2	Yes	Yes
	Programmed cell death protein 1	Q15116	PDCD1	Yes	Yes
	Natural killer cell receptor 2B4	Q9BZW8	CD244	Yes	Yes
	Stromal cell-derived factor 1	P48061	CXCL12	No	No
	T-cell surface glycoprotein CD4	P01730	CD4	Yes	Yes
	T-cell surface glycoprotein CD5	P06127	CD5	Yes	Yes
	T-cell surface glycoprotein CD8 alpha chain	P01732	CD8A	Yes	Yes
	T-cell-specific surface glycoprotein CD28	P10747	CD28	Yes	Yes
	TNF-related apoptosis-inducing ligand	P50591	TNFSF10	Yes	Yes
	Tumour necrosis factor	P01375	TNF	No	No
	Tumour necrosis factor ligand superfamily member 12	O43508	TNFSF12	Yes	Yes
	Tumour necrosis factor ligand superfamily member 14	O43557	TNFSF14	Yes	Yes
	Tumour necrosis factor receptor superfamily member 12A	Q9NP84	TNFRSF12A	Yes	Yes
	Tumour necrosis factor receptor superfamily member 21	O75509	TNFRSF21	Yes	Yes
	Tumour necrosis factor receptor superfamily member 4	P43489	TNFRSF4	Yes	Yes
	Tumour necrosis factor receptor superfamily member 9	Q07011	TNFRSF9	Yes	Yes
	Vascular endothelial growth factor A	P15692	VEGFA	Yes	Yes
	Vascular endothelial growth factor C	P49767	VEGFC	Yes	Yes
	Vascular endothelial growth factor receptor 2	P35968	KDR	Yes	Yes

## Sheet: Table S1
Table S1. Patient and clinical characteristics of all patients with metastatic cutaneous melanoma receiving immune checkpoint inhibitors (ICIs) or MAP-kinase inhibitors (MAPKis) as first-line treatment.
	Abbreviations: ICIs = immune checkpoint inhibitors, MAPKis = MAPK inhibitors, ULN = upper limit of normal, n = number, number after ± = standard deviation, p = p value obtained with a two-sided t/Wilcoxon/Fisher/logrank test correspondingly to the data.
	Patients and clinical characteristics	ICIs therapy (n = 24)	MAPKis therapy (n = 24)	p
	Median age at treatment start (years)	71 ± 14.48	56.5 ± 13.57	0.044
	Females – n (%)	11 (45.83)	9 (37.50)	0.075
	Males – n (%)	13 (54.17)	15 (62.50)
	Baseline M-stage – n (%)
	M1a	1 (4.17)	2 (8.30)	0.022
	M1b	6 (25.00)	0
	M1c-d	17 (70.83)	22 (91.67)
	Baseline LDH
	Median (μkat/L)	3.90 ± 4.68	4.85 ± 13.83	0.038
	≦ ULN – n (%)	12 (50.00)	6 (25.00)	0.075
	> ULN – n (%)	11 (45.83)	18 (75.00)
	Missing data – n (%)	1 (4.17)	0 (0.00)
	First-line therapy – n (%)
	anti-PD-1	16 (66.67)	0	NA
	anti-CTLA-4	6 (25.00)	0
	anti-PD-1 and anti-CTLA-4	2 (8.33)	0
	BRAF-inhibitor	0	15 (62.5)
	BRAF- and MEK- inhibitors	0	9 (37.5)
	Best treatment response – n (%)
	Complete response	5 (20.83)	1 (4.17)	0.022
	Partial response	4 (16.67)	13 (54.17)
	Stable disease	6 (25.00)	2 (8.33)
	Progressive disease (no response)	9 (37.50)	7 (29.17)
	Missing data	0	1 (4.17)
	Progression free survival – median (days)	211 ± 386.58	149.5 ± 161.94	0.025
	Overall survival – median (days)	621.5 ± 378.94	270.5 ± 379.89	0.008

## Sheet: Table S2
Table S2. Change in plasma levels during treatment with anti-PD-1 immune checkpoint inhibitors analysed with HiRIEF LC-MS/MS.
	Values of log2-FC > 0 is increase in plasma levels, whereas log2-FC < 0 is decrease in plasma levels during treatment.
	The underlined proteins had also a log2-FC in plasma of patients treated with MAPK inhibitors.
	The p values are obtained with a two-sided paired t test, comparing treatment to pre-treatment samples. The q values are adjusted p values with FDR correction for multiple testing.
	The effect size is calculated with Cohen’s d.					Abbreviations: log2-FC = log2 fold change, min = lowest value, max = highest value, SD - standard deviation, df - degrees of freedom.
	Protein	mean log2-FC	min	max	SD	df	t	p	q	d
	PDCD1	2.028	0.431	2.839	0.865	6	6.204	0.001	0.313	2.345
	IGHA1	0.614	-0.222	2.414	0.734	9	2.643	0.027	0.63	0.836
	TUBB1	0.545	0.166	1.33	0.43	5	3.103	0.027	0.63	1.267
	LILRA5	0.45	-0.537	1.788	0.636	11	2.448	0.032	0.63	0.707
	IGLC2	0.44	-0.217	1.329	0.454	9	3.067	0.013	0.63	0.97
	SDC1	0.438	-0.175	1.715	0.565	9	2.451	0.037	0.63	0.775
	SUMO2	0.423	-0.131	1.285	0.483	7	2.479	0.042	0.63	0.876
	C1S	0.415	-0.273	1.095	0.493	9	2.66	0.026	0.63	0.841
	GP6	0.391	-0.215	0.664	0.296	6	3.501	0.013	0.63	1.323
	FSTL3	0.382	0.055	0.727	0.238	7	4.537	0.003	0.518	1.604
	PTMA	0.306	-0.103	0.799	0.348	7	2.488	0.042	0.63	0.88
	WARS	0.305	-0.22	0.97	0.329	11	3.21	0.008	0.63	0.927
	FGL2	0.3	-0.069	0.771	0.256	11	4.054	0.002	0.442	1.17
	CHIT1	0.283	-0.351	1.188	0.433	11	2.266	0.045	0.63	0.654
	PLS1	0.278	-0.232	0.908	0.364	9	2.418	0.039	0.63	0.765
	IL6R	0.274	0.049	0.528	0.157	9	5.505	<0.001	0.313	1.741
	ACTR3	0.268	-0.247	1.101	0.35	11	2.655	0.022	0.63	0.766
	IGHD	0.263	-0.199	0.938	0.369	11	2.473	0.031	0.63	0.714
	VMO1	0.258	-0.132	0.725	0.253	11	3.54	0.005	0.563	1.022
	SIAE	0.254	-0.274	0.731	0.273	9	2.946	0.016	0.63	0.932
	IL1RL1	0.25	-0.196	0.665	0.311	9	2.547	0.031	0.63	0.805
	LILRA3	0.229	-0.073	1.095	0.351	11	2.265	0.045	0.63	0.654
	FDPS	0.224	-0.115	0.979	0.305	11	2.546	0.027	0.63	0.735
	VEGFD	0.216	-0.068	0.551	0.21	9	3.258	0.01	0.63	1.03
	SCUBE2	0.209	-0.013	0.43	0.14	7	4.241	0.004	0.563	1.5
	NPL	0.2	-0.019	0.455	0.175	5	2.812	0.037	0.63	1.148
	PRG2	0.199	-0.106	0.617	0.244	11	2.818	0.017	0.63	0.813
	HPN	0.197	-0.194	0.492	0.23	9	2.715	0.024	0.63	0.859
	EPB41L3	0.192	-0.295	0.633	0.244	9	2.487	0.035	0.63	0.787
	CSF1R	0.192	-0.097	0.907	0.3	11	2.217	0.049	0.63	0.64
	PSAP	0.183	-0.037	0.568	0.198	11	3.205	0.008	0.63	0.925
	ITGAL	0.18	-0.163	0.637	0.235	9	2.417	0.039	0.63	0.764
	GUCA2A	0.18	-0.044	0.503	0.18	11	3.459	0.005	0.563	0.999
	SIRPB1	0.178	-0.187	0.588	0.231	11	2.666	0.022	0.63	0.77
	CECR1	0.175	-0.179	0.784	0.271	11	2.24	0.047	0.63	0.647
	CGREF1	0.166	-0.138	0.357	0.187	7	2.507	0.041	0.63	0.886
	LCP1	0.165	-0.097	0.624	0.217	11	2.647	0.023	0.63	0.764
	PIGR	0.161	-0.239	0.72	0.228	11	2.449	0.032	0.63	0.707
	CSF1	0.161	-0.203	0.475	0.195	11	2.86	0.016	0.63	0.825
	SFTPA2	0.159	-0.111	0.596	0.216	11	2.555	0.027	0.63	0.738
	RCSD1	0.157	0.027	0.427	0.145	5	2.659	0.045	0.63	1.086
	VCAM1	0.154	-0.108	0.518	0.212	11	2.505	0.029	0.63	0.723
	CASC4	0.15	-0.183	0.433	0.205	11	2.53	0.028	0.63	0.73
	GANAB	0.141	-0.104	0.621	0.205	11	2.387	0.036	0.63	0.689
	LAMA5	0.139	-0.119	0.475	0.185	9	2.375	0.042	0.63	0.751
	GALNT7	0.136	-0.047	0.378	0.14	11	3.367	0.006	0.607	0.972
	PTPRK	0.136	-0.032	0.613	0.18	11	2.615	0.024	0.63	0.755
	NQO2	0.13	-0.199	0.486	0.18	11	2.509	0.029	0.63	0.724
	TALDO1	0.127	-0.207	0.485	0.188	11	2.343	0.039	0.63	0.676
	ICOSLG	0.126	-0.128	0.408	0.152	11	2.86	0.016	0.63	0.826
	GOLM1	0.122	-0.21	0.4	0.162	11	2.624	0.024	0.63	0.758
	CTSZ	0.117	-0.065	0.375	0.116	11	3.499	0.005	0.563	1.01
	PON1	0.11	-0.108	0.329	0.146	11	2.602	0.025	0.63	0.751
	MARCKS	0.108	-0.045	0.426	0.145	11	2.587	0.025	0.63	0.747
	ADGRE5	0.106	-0.109	0.332	0.141	9	2.387	0.041	0.63	0.755
	NPC2	0.103	-0.133	0.348	0.156	11	2.302	0.042	0.63	0.665
	FBLN2	0.098	-0.044	0.371	0.141	11	2.395	0.036	0.63	0.691
	CTSS	0.094	-0.13	0.259	0.113	11	2.874	0.015	0.63	0.83
	GSS	0.08	-0.099	0.326	0.123	11	2.247	0.046	0.63	0.649
	F8	0.071	-0.036	0.369	0.109	11	2.267	0.045	0.63	0.654
	PROS1	-0.069	-0.251	0.069	0.106	11	-2.252	0.046	0.63	0.65
	IGFALS	-0.073	-0.219	0.091	0.1	11	-2.527	0.028	0.63	0.729
	BCHE	-0.077	-0.345	0.091	0.119	11	-2.235	0.047	0.63	0.645
	SERPINA4	-0.093	-0.266	0.096	0.121	11	-2.651	0.023	0.63	0.765
	COLEC10	-0.095	-0.259	0.149	0.126	11	-2.607	0.024	0.63	0.753
	IGHV3OR16-9	-0.155	-0.288	0.118	0.113	9	-4.339	0.002	0.442	1.372
	PEBP1	-0.163	-0.442	0.18	0.195	11	-2.89	0.015	0.63	0.834
	AHNAK	-0.164	-0.392	0.036	0.126	8	-3.905	0.005	0.563	1.302
	FGFBP2	-0.181	-0.455	0.289	0.217	11	-2.885	0.015	0.63	0.833
	INHBE	-0.213	-0.687	0.2	0.311	11	-2.371	0.037	0.63	0.685
	KLKB1	-0.216	-0.667	0.334	0.288	11	-2.599	0.025	0.63	0.75
	CST6	-0.224	-0.913	0.034	0.287	11	-2.705	0.02	0.63	0.781
	PCOLCE	-0.232	-0.737	0.414	0.309	11	-2.602	0.025	0.63	0.751
	C4BPA	-0.242	-0.863	0.307	0.336	11	-2.496	0.03	0.63	0.72
	CDH17	-0.253	-1.078	0.253	0.37	11	-2.37	0.037	0.63	0.684
	POSTN	-0.253	-0.923	0.197	0.334	9	-2.393	0.04	0.63	0.757
	ENDOD1	-0.266	-1.09	0.013	0.304	9	-2.77	0.022	0.63	0.876
	C4BPB	-0.288	-0.848	0.249	0.343	11	-2.91	0.014	0.63	0.84
	DSC3	-0.314	-0.818	0.114	0.237	11	-4.584	0.001	0.313	1.323
	CMBL	-0.556	-1.035	-0.131	0.355	5	-3.835	0.012	0.63	1.566

## Sheet: Table S3
Table S3. Change in plasma levels during treatment with anti-PD-1 immune checkpoint inhibitors analysed with PEA.
	Values of log2-FC > 0 is increase in plasma levels, whereas log2-FC < 0 is decrease in plasma levels during treatment.
	The underlined proteins had also a log2-FC in plasma of patients treated with MAPK inhibitors.
	The p values are obtained with a two-sided paired t test, comparing treatment to pre-treatment samples. The q values are adjusted p values with FDR correction for multiple testing.
	The effect size is calculated with Cohen’s d.					Abbreviations: log2-FC = log2 fold change, min = lowest value, max = highest value, SD - standard deviation, df - degrees of freedom.
	Gene ID	mean log2-FC	min	max	SD	df	t	p	q	d
	PDCD1	1.292	0.632	2.264	0.514	9	7.942	<0.001	0.002	2.511
	CXCL9	1.142	0.487	2.89	0.715	9	5.046	0.001	0.017	1.596
	CCL3	0.614	-0.131	1.969	0.575	9	3.381	0.008	0.052	1.069
	CCL19	0.603	-0.447	2.133	0.731	9	2.608	0.028	0.095	0.825
	IL10	0.531	-0.131	1.144	0.406	9	4.134	0.003	0.028	1.307
	CCL4	0.48	-0.063	1.278	0.446	9	3.404	0.008	0.052	1.076
	TNFRSF9	0.458	-0.092	0.967	0.296	9	4.891	0.001	0.017	1.547
	TNFRSF4	0.415	-0.075	0.978	0.361	9	3.637	0.005	0.048	1.15
	IL12A/IL12B	0.395	-0.354	1.227	0.454	9	2.746	0.023	0.084	0.868
	GZMA	0.384	-0.206	0.965	0.336	9	3.615	0.006	0.048	1.143
	LAMP3	0.374	-0.313	1.397	0.449	9	2.638	0.027	0.095	0.834
	CRTAM	0.366	-0.132	0.831	0.327	9	3.542	0.006	0.048	1.12
	IL12RB1	0.337	-0.052	0.798	0.248	9	4.3	0.002	0.027	1.36
	LGALS9	0.318	0.094	0.744	0.236	9	4.258	0.002	0.027	1.347
	CXCL8	0.304	-0.212	0.813	0.327	9	2.949	0.016	0.084	0.932
	KLRD1	0.278	-0.193	0.756	0.286	9	3.07	0.013	0.079	0.971
	NCR1	0.27	-0.166	0.693	0.312	9	2.741	0.023	0.084	0.867
	CD274	0.267	-0.458	0.669	0.305	9	2.769	0.022	0.084	0.876
	CD70	0.229	-0.187	0.572	0.255	9	2.835	0.02	0.084	0.896
	CD5	0.219	-0.215	0.597	0.252	9	2.739	0.023	0.084	0.866
	CD28	0.193	0.075	0.421	0.113	9	5.409	<0.001	0.016	1.711
	CD27	0.19	-0.238	0.476	0.209	9	2.88	0.018	0.084	0.911
	CD83	0.17	-0.085	0.384	0.188	9	2.856	0.019	0.084	0.903

## Sheet: Table S4
Table S4. Change in protein plasma levels in the anti-PD-1 immune checkpoint inhibitor subgroup of responders, HiRIEF LC-MS/MS.
	Values of log2-FC > 0 is increase in plasma levels, whereas log2-FC < 0 is decrease in plasma levels during treatment.
	The underlined proteins had also a log2-FC in plasma of patients treated with MAPK inhibitors.
	The p values are obtained with a two-sided paired t test, comparing treatment to pre-treatment samples. The q values are adjusted p values with FDR correction for multiple testing.
	The effect size is calculated with Cohen’s d.					Abbreviations: log2-FC = log2 fold change, min = lowest value, max = highest value, SD - standard deviation, df - degrees of freedom.
	Responders were patients who had CR, PR, or SD as best response during treatment.
	Protein	mean log2-FC	min	max	SD	df	t	p	q	d
	PDCD1	2.093	1.546	2.6	0.574	3	7.297	0.005	0.662	3.648
	HP	0.804	-0.036	2.18	0.855	7	2.659	0.033	0.671	0.94
	IGHA1	0.8	0.187	2.414	0.766	6	2.763	0.033	0.671	1.044
	CRP	0.721	-0.014	2.006	0.699	7	2.918	0.022	0.671	1.032
	PRG3	0.674	0.262	0.998	0.31	4	4.866	0.008	0.662	2.176
	C1S	0.53	-0.025	1.095	0.487	5	2.667	0.045	0.671	1.089
	TUBB1	0.388	0.166	0.715	0.215	4	4.033	0.016	0.662	1.804
	FGL2	0.325	-0.069	0.771	0.282	7	3.26	0.014	0.662	1.153
	CALU	0.316	-0.272	0.781	0.372	7	2.407	0.047	0.671	0.851
	THBS2	0.315	-0.003	0.86	0.292	7	3.056	0.018	0.671	1.08
	SIAE	0.301	0.048	0.731	0.242	6	3.291	0.017	0.662	1.244
	FDPS	0.293	-0.107	0.979	0.337	7	2.462	0.043	0.671	0.87
	IL6R	0.262	0.078	0.528	0.168	5	3.824	0.012	0.662	1.561
	SPARC	0.261	-0.237	0.65	0.304	7	2.43	0.045	0.671	0.859
	FGL1	0.251	-0.05	0.839	0.295	7	2.41	0.047	0.671	0.852
	ACTR3	0.234	0.055	0.61	0.186	7	3.561	0.009	0.662	1.259
	LRG1	0.232	-0.071	0.771	0.267	7	2.458	0.044	0.671	0.869
	WARS	0.224	0.016	0.635	0.193	7	3.283	0.013	0.662	1.161
	PRAP1	0.202	0.063	0.36	0.111	7	5.172	0.001	0.662	1.829
	SDC1	0.202	0.008	0.447	0.187	5	2.643	0.046	0.671	1.079
	PIGR	0.2	-0.102	0.72	0.238	7	2.377	0.049	0.671	0.84
	PRG2	0.194	-0.061	0.488	0.213	7	2.574	0.037	0.671	0.91
	GUCA2A	0.19	-0.004	0.425	0.16	7	3.356	0.012	0.662	1.187
	CSF1	0.176	-0.046	0.475	0.176	7	2.83	0.025	0.671	1.001
	TALDO1	0.162	-0.054	0.485	0.191	7	2.407	0.047	0.671	0.851
	CASC4	0.157	-0.163	0.418	0.188	7	2.368	0.05	0.671	0.837
	PPP1R9B	0.155	-0.041	0.397	0.141	7	3.108	0.017	0.662	1.099
	ITGAL	0.145	-0.156	0.318	0.156	6	2.459	0.049	0.671	0.929
	SERPINA3	0.137	-0.004	0.362	0.123	7	3.146	0.016	0.662	1.112
	CP	0.136	-0.033	0.362	0.143	7	2.693	0.031	0.671	0.952
	C9	0.123	-0.042	0.241	0.096	7	3.611	0.009	0.662	1.277
	ITGB2	0.123	0.037	0.211	0.064	5	4.724	0.005	0.662	1.929
	PON1	0.122	-0.108	0.302	0.137	7	2.518	0.04	0.671	0.89
	LBP	0.118	-0.092	0.259	0.115	7	2.883	0.024	0.671	1.019
	FAM20C	0.114	-0.028	0.225	0.09	7	3.577	0.009	0.662	1.265
	GOLM1	0.112	0.004	0.347	0.113	7	2.819	0.026	0.671	0.997
	CTSZ	0.111	-0.065	0.375	0.133	7	2.366	0.05	0.671	0.836
	GALNT7	0.11	-0.042	0.328	0.122	7	2.546	0.038	0.671	0.9
	A1BG	0.105	-0.153	0.231	0.119	7	2.496	0.041	0.671	0.882
	GNPDA1	0.105	0.073	0.165	0.041	3	5.075	0.015	0.662	2.537
	ICOSLG	0.104	-0.128	0.209	0.122	7	2.416	0.046	0.671	0.854
	CRISP3	0.1	-0.024	0.288	0.114	7	2.47	0.043	0.671	0.873
	GANAB	0.1	-0.104	0.304	0.112	7	2.513	0.04	0.671	0.888
	GM2A	0.086	-0.02	0.207	0.074	7	3.299	0.013	0.662	1.166
	VTN	0.083	-0.02	0.23	0.086	7	2.738	0.029	0.671	0.968
	C2	0.069	-0.05	0.194	0.079	7	2.467	0.043	0.671	0.872
	HSP90B1	0.066	-0.027	0.199	0.069	7	2.719	0.03	0.671	0.961
	ITGA7	0.055	-0.035	0.135	0.053	7	2.954	0.021	0.671	1.045
	CNTN3	-0.047	-0.091	0.02	0.034	7	-3.894	0.006	0.662	1.377
	ITGB6	-0.075	-0.12	-0.021	0.039	5	-4.788	0.005	0.662	1.954
	QSOX1	-0.076	-0.212	0.019	0.086	7	-2.519	0.04	0.671	0.891
	ADAMTS13	-0.079	-0.247	0	0.084	7	-2.659	0.033	0.671	0.94
	PLS3	-0.08	-0.201	0.029	0.084	7	-2.662	0.032	0.671	0.941
	RGMA	-0.081	-0.173	0.06	0.084	7	-2.699	0.031	0.671	0.954
	PGLYRP2	-0.088	-0.238	0.06	0.098	7	-2.562	0.037	0.671	0.906
	LAMA2	-0.099	-0.287	0.053	0.104	7	-2.69	0.031	0.671	0.951
	AHNAK	-0.108	-0.248	0.036	0.101	5	-2.633	0.046	0.671	1.075
	CNTN4	-0.108	-0.31	0.052	0.114	7	-2.676	0.032	0.671	0.946
	CFH	-0.119	-0.206	-0.005	0.083	7	-4.072	0.005	0.662	1.44
	ITIH2	-0.124	-0.369	0.101	0.14	7	-2.508	0.041	0.671	0.887
	CRYZ	-0.131	-0.304	0.014	0.108	5	-2.95	0.032	0.671	1.204
	IGFBP5	-0.132	-0.279	0	0.085	7	-4.398	0.003	0.662	1.555
	IGHV3OR16-9	-0.136	-0.288	0.118	0.129	6	-2.809	0.031	0.671	1.062
	CRTAC1	-0.139	-0.468	-0.006	0.154	7	-2.562	0.037	0.671	0.906
	CR2	-0.144	-0.303	0.087	0.144	7	-2.837	0.025	0.671	1.003
	CLSTN1	-0.144	-0.302	0.067	0.107	7	-3.799	0.007	0.662	1.343
	CFHR1	-0.161	-0.378	0.054	0.176	7	-2.585	0.036	0.671	0.914
	ENDOD1	-0.168	-0.336	0.013	0.122	5	-3.382	0.02	0.671	1.381
	SELENOP	-0.179	-0.618	0.035	0.2	7	-2.529	0.039	0.671	0.894
	ANG	-0.183	-0.57	0.023	0.197	7	-2.629	0.034	0.671	0.93
	QSOX2	-0.184	-0.471	-0.021	0.186	7	-2.79	0.027	0.671	0.986
	FGFBP2	-0.197	-0.455	0.06	0.164	7	-3.394	0.012	0.662	1.2
	PCOLCE	-0.206	-0.505	0.001	0.155	7	-3.755	0.007	0.662	1.328
	DSC3	-0.21	-0.517	0.114	0.182	7	-3.251	0.014	0.662	1.149
	CLEC3B	-0.215	-0.585	-0.026	0.208	7	-2.926	0.022	0.671	1.035
	DLD	-0.231	-0.424	0.045	0.185	6	-3.301	0.016	0.662	1.248
	KLKB1	-0.231	-0.667	0.064	0.21	7	-3.113	0.017	0.662	1.101
	IGF2	-0.252	-0.588	-0.043	0.185	7	-3.844	0.006	0.662	1.359
	APOH	-0.257	-0.795	-0.083	0.232	7	-3.132	0.017	0.662	1.107
	HRG	-0.296	-0.889	0.057	0.315	7	-2.659	0.033	0.671	0.94
	FTH1	-0.305	-0.971	-0.007	0.303	7	-2.843	0.025	0.671	1.005
	CAMP	-0.46	-1.187	0.036	0.475	7	-2.742	0.029	0.671	0.97
	CMBL	-0.536	-1.035	-0.131	0.393	4	-3.048	0.038	0.671	1.363
	KRT82	-0.903	-1.266	-0.632	0.281	3	-6.429	0.008	0.662	3.215

## Sheet: Table S5
Table S5. Change in protein plasma levels in the anti-PD-1 immune checkpoint inhibitor subgroup of non-responders, HiRIEF LC-MS/MS.
	Values of log2-FC > 0 is increase in plasma levels, whereas log2-FC < 0 is decrease in plasma levels during treatment.
	The underlined proteins had also a log2-FC in plasma of patients treated with MAPK inhibitors.
	The p values are obtained with a two-sided paired t test, comparing treatment to pre-treatment samples. The q values are adjusted p values with FDR correction for multiple testing.
	The effect size is calculated with Cohen’s d.					Abbreviations: log2-FC = log2 fold change, min = lowest value, max = highest value, SD - standard deviation, df - degrees of freedom.
	Protein	mean log2-FC	min	max	SD	df	t	p	q	d
	IGLC2	0.54	0.15	0.701	0.262	3	4.126	0.026	0.991	2.063
	CHI3L1	0.526	0.313	0.785	0.23	3	4.577	0.02	0.991	2.288
	VMO1	0.294	0.073	0.453	0.16	3	3.67	0.035	0.991	1.835
	IL6R	0.291	0.049	0.397	0.163	3	3.576	0.037	0.991	1.788
	CTGF	0.288	0.151	0.383	0.098	3	5.872	0.01	0.991	2.936
	MYH7	0.262	0.106	0.347	0.108	3	4.848	0.017	0.991	2.424
	PSMB1	0.234	0.197	0.296	0.046	3	10.114	0.002	0.971	5.057
	SCUBE2	0.226	0.1	0.335	0.101	3	4.479	0.021	0.991	2.24
	LDHB	0.195	0.038	0.287	0.109	3	3.59	0.037	0.991	1.795
	GALNT6	0.158	0.09	0.261	0.083	3	3.803	0.032	0.991	1.901
	FOLR2	0.157	0.043	0.214	0.079	3	3.958	0.029	0.991	1.979
	FTH1	0.148	0.053	0.232	0.078	3	3.784	0.032	0.991	1.892
	CTSS	0.135	0.046	0.229	0.075	3	3.59	0.037	0.991	1.795
	SPARCL1	0.131	0.038	0.18	0.066	3	4.012	0.028	0.991	2.006
	LCN2	0.127	0.049	0.172	0.054	3	4.746	0.018	0.991	2.373
	GBA	-0.158	-0.252	-0.075	0.073	3	-4.348	0.022	0.991	-2.174
	COLEC11	-0.159	-0.187	-0.135	0.022	3	-14.716	0.001	0.642	-7.358
	MXRA5	-0.176	-0.237	-0.032	0.096	3	-3.648	0.036	0.991	-1.824
	SSC5D	-0.192	-0.333	-0.067	0.109	3	-3.524	0.039	0.991	-1.762
	ANXA2	-0.278	-0.374	-0.198	0.089	3	-6.249	0.008	0.991	-3.124
	C4BPB	-0.447	-0.675	-0.247	0.195	3	-4.577	0.02	0.991	-2.289
	ANGPTL6	-0.5	-0.769	-0.341	0.201	3	-4.975	0.016	0.991	-2.488
	DSC3	-0.523	-0.818	-0.356	0.204	3	-5.115	0.014	0.991	-2.557
	CFP	-0.63	-0.936	-0.352	0.241	3	-5.222	0.014	0.991	-2.611
	C1QB	-0.695	-1.137	-0.177	0.397	3	-3.497	0.04	0.991	-1.748
	C1QA	-0.913	-1.522	-0.59	0.423	3	-4.319	0.023	0.991	-2.159
	SLPI	-1.034	-1.471	-0.583	0.448	3	-4.615	0.019	0.991	-2.308
	C1QC	-1.066	-1.906	-0.536	0.591	3	-3.607	0.037	0.991	-1.803

## Sheet: Table S6
Table S6. Proteins with differentially altered plasma levels in the anti-PD-1 immune checkpoint inhibitor subgroup of responders as compared to the subgroup of anti-PD-1 non-responders, HiRIEF LC-MS/MS.
	Values of log2-FC > 0 = higher plasma levels in responders, whereas log2-FC < 0 = lower levels in responders.
	The p values are obtained with a two-sided unpaired t test, whereas the q values with FDR correction for multiple testing.
	The effect size is calculated with Cohen’s d, with Hedges' correction
	Responders were patients who had CR, PR, or SD as best response during treatment.
	Protein	mean log2-FC	S.E. (mean)	df	t	p	q	d
	C1QC	1.24868	0.428697	8.72038	2.91274	0.0178073	0.995776	1.4356
	LECT2	1.1916	0.438481	5.22114	2.71756	0.0400521	0.995776	1.49285
	C1QA	1.06629	0.349457	9.79633	3.05128	0.0125072	0.995776	1.41018
	C1QB	0.826097	0.256184	6.98003	3.22462	0.0146169	0.995776	1.73194
	FCGR3A	0.709702	0.277271	6.1257	2.5596	0.0421528	0.995776	1.44421
	B4GALT1	0.688564	0.269875	9.91005	2.55141	0.0289824	0.995776	1.11369
	CFP	0.5658	0.193525	9.63589	2.92366	0.0157839	0.995776	1.36867
	TPP1	0.538578	0.22856	7.81757	2.3564	0.0469296	0.995776	1.08792
	LGALS3BP	0.512132	0.147732	8.61956	3.46664	0.00756631	0.995776	1.71707
	ANGPTL6	0.426264	0.157292	9.47663	2.71002	0.0229512	0.995776	1.28223
	LSR	0.375232	0.135781	7.57578	2.76351	0.0258627	0.995776	1.43971
	PRG4	0.362182	0.140091	5.28509	2.58532	0.0466127	0.995776	1.54836
	PRAP1	0.361875	0.108897	3.91547	3.32308	0.0302495	0.995776	2.30795
	MXRA5	0.343272	0.094207	9.92923	3.64381	0.00456114	0.995776	1.59442
	DSC3	0.312932	0.120854	5.49458	2.58935	0.0447233	0.995776	1.52573
	AHSP	0.301733	0.116368	5.97568	2.59293	0.0412025	0.995776	1.35421
	NUCB1	0.274397	0.116219	9.99964	2.36104	0.0398834	0.995776	1.05496
	SSC5D	0.233287	0.0649041	5.57939	3.59434	0.0129589	0.995776	2.10462
	VTN	0.128308	0.0433693	8.26074	2.9585	0.0175554	0.995776	1.49099
	PGLYRP2	-0.0984031	0.0348754	7.29094	-2.82156	0.0246543	0.995776	1.10966
	SPARCL1	-0.145163	0.0461212	8.33244	-3.14742	0.0129688	0.995776	1.58075
	RGMA	-0.189999	0.0514154	6.14233	-3.69538	0.00972649	0.995776	2.08287
	GALNT6	-0.197697	0.0596261	8.555	-3.31562	0.00965696	0.995776	1.64744
	PSMB8	-0.225764	0.0597309	5.69077	-3.77968	0.0101354	0.995776	1.52784
	MYH7	-0.24006	0.100838	9.99119	-2.38065	0.0385905	0.995776	1.05486
	LAMA2	-0.242394	0.0863635	4.38345	-2.80667	0.0436904	0.995776	1.83305
	LDHB	-0.282149	0.068229	6.50967	-4.13532	0.00512154	0.995776	2.27978
	PLS3	-0.282288	0.0719503	4.29916	-3.92338	0.0149663	0.995776	2.58809
	CTGF	-0.315633	0.108408	9.5817	-2.91151	0.0162014	0.995776	1.2395
	FTH1	-0.452976	0.114103	8.638	-3.9699	0.00353254	0.995776	1.62576
	IGHM	-0.807441	0.328735	8.54806	-2.45621	0.0377168	0.995776	1.22083

## Sheet: Table S7
Table S7. Change in protein plasma levels in the anti-PD-1 immune checkpoint inhibitor subgroup of responders, PEA.
	Values of log2-FC > 0 is increase in plasma levels, whereas log2-FC < 0 is decrease in plasma levels during treatment.
	The underlined proteins had also a log2-FC in plasma of patients treated with MAPK inhibitors.
	The p values are obtained with a two-sided paired t test, comparing treatment to pre-treatment samples. The q values are adjusted p values with FDR correction for multiple testing.
	The effect size is calculated with Cohen’s d.					Abbreviations: log2-FC = log2 fold change, min = lowest value, max = highest value, SD - standard deviation, df - degrees of freedom.
	Responders were patients who had CR, PR, or SD as best response during treatment.
	Protein	mean log2-FC	min	max	SD	df	t	p	q	d
	CXCL9	1.182	0.603	2.89	0.795	6	3.933	0.008	0.058	1.486
	PDCD1	1.177	0.632	1.631	0.341	6	9.141	<0.001	0.007	3.455
	CXCL10	0.856	-0.235	2.382	0.882	6	2.569	0.042	0.091	0.971
	IL6	0.731	0.038	1.773	0.607	6	3.184	0.019	0.07	1.204
	CCL3	0.688	-0.131	1.969	0.671	6	2.713	0.035	0.086	1.025
	IL10	0.631	0.328	1.144	0.329	6	5.077	0.002	0.053	1.919
	CCL19	0.606	-0.128	1.284	0.431	6	3.723	0.01	0.058	1.407
	CCL4	0.561	-0.063	1.278	0.508	6	2.926	0.026	0.074	1.106
	TNFSF14	0.549	0.158	1.07	0.326	6	4.451	0.004	0.053	1.682
	LAMP3	0.511	0.075	1.397	0.42	6	3.221	0.018	0.07	1.217
	GZMH	0.507	0.02	1.3	0.497	6	2.698	0.036	0.086	1.02
	IL18	0.506	0.072	1.562	0.509	6	2.63	0.039	0.091	0.994
	TNFRSF9	0.465	0.154	0.731	0.195	6	6.314	0.001	0.028	2.387
	IL12A/IL12B	0.447	0.219	0.913	0.253	6	4.677	0.003	0.053	1.768
	CD8A	0.417	-0.034	0.866	0.343	6	3.218	0.018	0.07	1.216
	CRTAM	0.406	-0.132	0.831	0.357	6	3.011	0.024	0.074	1.138
	GZMA	0.385	0.151	0.791	0.234	6	4.35	0.005	0.053	1.644
	IL12RB1	0.379	-0.052	0.798	0.272	6	3.693	0.01	0.058	1.396
	TNFRSF4	0.379	-0.075	0.935	0.311	6	3.225	0.018	0.07	1.219
	LGALS9	0.367	0.094	0.744	0.264	6	3.668	0.01	0.058	1.387
	CD274	0.338	0.057	0.669	0.196	6	4.558	0.004	0.053	1.723
	ADA	0.329	0.045	0.941	0.335	6	2.6	0.041	0.091	0.983
	KLRD1	0.327	-0.193	0.756	0.281	6	3.079	0.022	0.073	1.164
	CD70	0.301	-0.131	0.572	0.232	6	3.432	0.014	0.07	1.297
	NCR1	0.293	-0.154	0.693	0.301	6	2.575	0.042	0.091	0.973
	VEGFA	0.271	-0.056	0.545	0.223	6	3.225	0.018	0.07	1.219
	CD5	0.256	-0.071	0.597	0.226	6	2.996	0.024	0.074	1.132
	MICA/MICB	0.252	0.033	0.514	0.215	5	2.872	0.035	0.086	1.173
	CD27	0.246	-0.028	0.476	0.172	6	3.796	0.009	0.058	1.435
	CD83	0.236	-0.014	0.384	0.164	6	3.79	0.009	0.058	1.433
	CD28	0.201	0.075	0.421	0.127	6	4.207	0.006	0.054	1.59
	CSF1	0.191	-0.041	0.489	0.174	6	2.889	0.028	0.074	1.092
	TEK	0.188	-0.146	0.411	0.173	6	2.885	0.028	0.074	1.091
	TGFB1	0.152	-0.068	0.355	0.128	6	3.137	0.02	0.071	1.186
	CD4	0.149	-0.077	0.317	0.135	6	2.905	0.027	0.074	1.098
	KDR	0.118	-0.058	0.257	0.096	6	3.261	0.017	0.07	1.232

## Sheet: Table S8
Table S8. All proteins whose pre-treatment (pre-trm) plasma levels had an association with PFS in the anti-PD-1 immune checkpoint inhibitor cohort, analysed with HiRIEF LC-MS/MS, univariate Cox models.
	The β estimates are obtained with univariate Cox proportional hazards models.
	The hazard ratios are exponents of the β estimates, here provided with 95% confidence intervals.
	The statistical significance of the models is determined with the likelihood ratio test (LRT). pLRT refers to the p value obtained by the LRT, whereas pHR refers to the p value of the HR estimate
	HR > 1 = shorter PFS, HR < 1 = longer PFS. Some values of the 95% CI are rounded to 1, but do not include 1.
	The q values are obtained with the FDR procedure for multiple testing and are adjustment for the pLRT.
	Note: Extremely high/low HR estimates with very wide confidence interval are less reliable.
	Protein	β	HR	95% CI of HR	LRT value	pHR	pLRT	q	Note
	ICAM1	2.32	10.1	1.9-55	9.06	0.007	0.003	0.239	More reliable
	CALR	2.11	8.27	1.8-39	9.34	0.007	0.002	0.239	More reliable
	FCGRT	1.95	7.02	1.7-30	8.74	0.008	0.003	0.239	More reliable
	CFI	1.93	6.91	1.3-38	5.55	0.026	0.019	0.358	More reliable
	F9	1.84	6.28	1.3-31	6.11	0.024	0.013	0.351	More reliable
	GSTP1	1.78	5.91	1.5-23	11.1	0.011	0.001	0.239	More reliable
	ADGRG6	1.7	5.46	1.1-27	4.35	0.039	0.037	0.382	More reliable
	CRIP1	1.69	5.44	1.1-27	7.36	0.038	0.007	0.258	More reliable
	MMRN1	1.68	5.38	1.2-25	9.49	0.032	0.002	0.239	More reliable
	PRAP1	1.63	5.1	1.8-15	16.2	0.003	<0.001	0.067	More reliable
	MGAT1	1.62	5.08	1.3-20	7.85	0.019	0.005	0.246	More reliable
	TNFRSF21	1.52	4.59	1.1-20	5.46	0.041	0.02	0.366	More reliable
	COL18A1	1.48	4.41	1.5-13	11.2	0.007	0.001	0.239	More reliable
	CHGA	1.46	4.29	1.3-14	6.66	0.016	0.01	0.336	More reliable
	SERPINA3	1.44	4.23	1.2-16	6.24	0.03	0.013	0.351	More reliable
	IGFBP4	1.44	4.24	1.1-17	4.25	0.039	0.039	0.382	More reliable
	DAG1	1.35	3.86	1.3-11	8.48	0.015	0.004	0.239	More reliable
	FCN2	1.27	3.55	1.3-9.6	9.19	0.012	0.002	0.239	More reliable
	COLEC11	1.24	3.45	1.1-11	4.5	0.035	0.034	0.382	More reliable
	PEBP4	1.23	3.4	1.2-9.9	5.45	0.025	0.02	0.366	More reliable
	UBA1	1.23	3.41	1-11	4.17	0.045	0.041	0.384	More reliable
	IL6ST	1.21	3.37	1.1-10	4.59	0.03	0.032	0.382	More reliable
	SECTM1	1.15	3.16	1.2-8.7	5.85	0.025	0.016	0.356	More reliable
	WARS	1.12	3.08	1.2-8	6.33	0.021	0.012	0.351	More reliable
	SCGB1A1	1.12	3.06	1.1-8.8	6.11	0.037	0.014	0.351	More reliable
	PTGDS	1.11	3.05	1.3-7.4	8.17	0.014	0.004	0.246	More reliable
	TBCA	1.04	2.83	1.2-6.7	8.06	0.019	0.005	0.246	More reliable
	DDT	1.04	2.82	1.1-7	7.89	0.025	0.005	0.246	More reliable
	LMAN2	1.04	2.84	1.1-7.6	4.63	0.037	0.031	0.382	More reliable
	DCBLD1	1.04	2.82	1-7.8	4.61	0.045	0.032	0.382	More reliable
	GALNT10	1.04	2.82	1-7.7	4.14	0.041	0.042	0.384	More reliable
	CFD	1.01	2.76	1-7.6	5.03	0.049	0.025	0.375	More reliable
	SIRPB1	0.996	2.71	1.2-6.3	7.95	0.021	0.005	0.246	More reliable
	ENDOD1	0.99	2.69	1.2-6.2	6.35	0.019	0.012	0.351	More reliable
	RNASE1	0.985	2.68	1.2-5.8	7.39	0.012	0.007	0.258	More reliable
	LDHB	0.955	2.6	1.2-5.6	6.85	0.014	0.009	0.315	More reliable
	ITIH3	0.949	2.58	1.1-5.9	5.02	0.025	0.025	0.375	More reliable
	PRKCSH	0.949	2.58	1.1-6	4.78	0.026	0.029	0.382	More reliable
	CTSZ	0.941	2.56	1.2-5.6	6.48	0.018	0.011	0.351	More reliable
	C9	0.94	2.56	1.1-5.7	5.59	0.022	0.018	0.358	More reliable
	IL1RAP	0.934	2.54	1-6.4	4.24	0.046	0.039	0.382	More reliable
	CBR1	0.923	2.52	1.1-5.6	7.57	0.024	0.006	0.258	More reliable
	PSMB5	0.915	2.5	1.1-5.6	5.77	0.027	0.016	0.356	More reliable
	LTA4H	0.915	2.5	1.1-5.9	5.06	0.038	0.025	0.375	More reliable
	GM2A	0.901	2.46	1.3-4.8	7.38	0.008	0.007	0.258	More reliable
	PRG4	0.89	2.44	1.1-5.6	5.07	0.035	0.024	0.375	More reliable
	CDH19	0.889	2.43	1.1-5.6	8.42	0.037	0.004	0.239	More reliable
	NIF3L1	0.877	2.4	1.1-5.2	5.14	0.026	0.023	0.372	More reliable
	YWHAB	0.876	2.4	1.1-5.2	5.24	0.027	0.022	0.366	More reliable
	MASP1	0.87	2.39	1.1-5.3	4.83	0.032	0.028	0.382	More reliable
	CDH2	0.862	2.37	1.2-4.8	5.79	0.017	0.016	0.356	More reliable
	CST3	0.856	2.35	1.1-4.8	6.28	0.02	0.012	0.351	More reliable
	RNASET2	0.848	2.33	1.1-5	5.75	0.029	0.017	0.356	More reliable
	LEPR	0.835	2.3	1.2-4.5	6.83	0.014	0.009	0.315	More reliable
	PSMB6	0.82	2.27	1.2-4.3	7.92	0.013	0.005	0.246	More reliable
	TPP1	0.81	2.25	1.2-4.3	8.96	0.016	0.003	0.239	More reliable
	VSIG4	0.797	2.22	1.3-3.8	10.2	0.004	0.001	0.239	More reliable
	LILRA5	0.794	2.21	1.1-4.5	5.27	0.03	0.022	0.366	More reliable
	ITGA5	0.792	2.21	1.1-4.5	5.21	0.028	0.023	0.368	More reliable
	F8	0.791	2.21	1-4.7	4.26	0.038	0.039	0.382	More reliable
	CAT	0.782	2.19	1.1-4.2	5.77	0.019	0.016	0.356	More reliable
	MB	0.722	2.06	1.2-3.5	7.54	0.009	0.006	0.258	More reliable
	HSP90AA1	0.718	2.05	1-4	4.96	0.036	0.026	0.375	More reliable
	PSMA5	0.709	2.03	1-4.1	4.09	0.047	0.043	0.384	More reliable
	CTSD	0.683	1.98	1.1-3.7	4.1	0.034	0.043	0.384	More reliable
	VMO1	0.677	1.97	1-3.8	4.29	0.042	0.038	0.382	More reliable
	DBI	0.676	1.97	1.2-3.2	8.53	0.005	0.004	0.239	More reliable
	LRG1	0.657	1.93	1.1-3.3	5.71	0.018	0.017	0.356	More reliable
	HEXB	0.641	1.9	1.1-3.4	4.79	0.032	0.029	0.382	More reliable
	CRELD1	0.626	1.87	1-3.4	4.81	0.042	0.028	0.382	More reliable
	TNFRSF1A	0.585	1.8	1.1-3	5.37	0.026	0.021	0.366	More reliable
	HEXA	0.585	1.79	1.1-3.1	4.71	0.031	0.03	0.382	More reliable
	TIMP1	0.56	1.75	1.1-2.8	4.76	0.024	0.029	0.382	More reliable
	GOT1	0.55	1.73	1-2.9	4.04	0.035	0.044	0.384	More reliable
	CPB1	0.528	1.7	1.1-2.7	4.67	0.027	0.031	0.382	More reliable
	PSMB7	0.523	1.69	1.1-2.7	5.3	0.03	0.021	0.366	More reliable
	FABP3	0.521	1.68	1-2.8	4.47	0.039	0.034	0.382	More reliable
	PSAT1	0.509	1.66	1-2.7	4.46	0.044	0.035	0.382	More reliable
	NQO2	0.505	1.66	1.2-2.4	10.4	0.005	0.001	0.239	More reliable
	CETP	0.493	1.64	1-2.6	4.68	0.044	0.031	0.382	More reliable
	CSTB	0.481	1.62	1.1-2.5	5.16	0.025	0.023	0.372	More reliable
	PSAP	0.43	1.54	1.1-2.2	4.94	0.026	0.026	0.375	More reliable
	APP	0.427	1.53	1-2.2	5.94	0.029	0.015	0.356	More reliable
	B2M	0.42	1.52	1-2.3	4.98	0.048	0.026	0.375	More reliable
	CRP	0.419	1.52	1-2.2	9.88	0.027	0.002	0.239	More reliable
	CDHR2	0.416	1.52	1.1-2.1	5.86	0.015	0.016	0.356	More reliable
	PRNP	0.396	1.49	1-2.2	4.7	0.046	0.03	0.382	More reliable
	NPPA	0.37	1.45	1-2	4.88	0.028	0.027	0.382	More reliable
	MYH7	0.324	1.38	1-1.9	4.25	0.045	0.039	0.382	More reliable
	B4GALT1	0.317	1.37	1-1.8	4.99	0.023	0.026	0.375	More reliable
	SAA2	0.311	1.36	1.1-1.8	6.28	0.019	0.012	0.351	More reliable
	MYOM3	0.255	1.29	1-1.6	4.1	0.041	0.043	0.384	More reliable
	IGFBP3	-0.467	0.627	0.4-0.97	4.39	0.037	0.036	0.382	More reliable
	KLKB1	-0.621	0.537	0.3-0.97	4.26	0.039	0.039	0.382	More reliable
	IGFBP5	-0.639	0.528	0.28-0.99	3.99	0.046	0.046	0.386	More reliable
	CBLN4	-0.658	0.518	0.31-0.86	6.6	0.012	0.01	0.338	More reliable
	LRRN1	-0.708	0.492	0.28-0.87	6.09	0.015	0.014	0.351	More reliable
	PTPRS	-0.772	0.462	0.22-0.99	3.92	0.046	0.048	0.39	More reliable
	PCSK9	-0.822	0.439	0.21-0.92	5.42	0.028	0.02	0.366	More reliable
	CILP2	-0.885	0.413	0.19-0.9	5.71	0.025	0.017	0.356	More reliable
	SELENOP	-1.01	0.364	0.15-0.91	5.26	0.031	0.022	0.366	More reliable
	HMCN2	-1.1	0.334	0.12-0.96	4.67	0.043	0.031	0.382	More reliable
	C8B	-1.5	0.223	0.057-0.87	4.59	0.031	0.032	0.382	More reliable
	MAN2A2	-1.53	0.216	0.059-0.79	5.35	0.02	0.021	0.366	More reliable
	SERPINA4	-1.54	0.213	0.056-0.82	5.59	0.025	0.018	0.358	More reliable
	GLIPR2	-1.66	0.19	0.046-0.79	5.57	0.022	0.018	0.358	More reliable
	PLS3	-1.74	0.175	0.033-0.92	5.56	0.04	0.018	0.358	More reliable
	CLEC3B	-1.82	0.162	0.047-0.56	13.1	0.004	<0.001	0.168	More reliable
	ADAMTS13	-3.47	0.0311	0.0016-0.62	7.3	0.023	0.007	0.259	Less reliable

[truncated: 5 more sheets: Table S9, Table S10, Table S11, Table S12, Table S13]
