# Supplementary material for: In-depth plasma proteomics reveals increase in circulating PD-1 during anti-PD-1 immunotherapy in patients with metastatic cutaneous melanoma
Source: J Immunother Cancer. 2020 May 20;8(1):e000204. doi: 10.1136/jitc-2019-000204 (PMC7253007; doi:10.1136/jitc-2019-000204)
Supplement: Supplementary data [file jitc-2019-000204supp004.xlsx]

## Sheet: Overview
Additional File 4
	Supplementary dataset - proximity extension assays data:
	In-depth plasma proteomics reveals increase in circulating PD-1 during anti-PD-1 immunotherapy in patients with metastatic cutaneous melanoma.
	Haris Babačić, Janne Lehtiö, Yago Pico de Coaña, Maria Pernemalm, Hanna Eriksson. 2020
	The following sheets contain the following information:
		1. Meta data - information on patient plasma samples
		Variables: sample_id, collected - when was the sample collected, matched - whether the samples have a match before and after treatment, treatment - which inhibitors the patient has received
		Treatment - inhibitors towards: BRAF = inh_BRAF, BRAF and MEK = inh_BRAF_MEK, CTLA-4 = ab_CTLA4, PD-1 = ab_PD1, PD-1 and CTLA-4 = ab_PD1_CTLA4.
		2. Quantification values of proteins - NPX values on a log2 scale. The rows represent patient samples, whereas the columns represent the measured proteins.
		3. Quality control - samples excluded due to poor quality.
		4. Full list of proteins analysed with PEA

## Sheet: 1. Meta data
sample_id	collected	matched	treatment
pre_001	before treatm.	yes	inh_BRAF
pre_002	before treatm.	yes	inh_BRAF
pre_003	before treatm.	yes	inh_BRAF
pre_004	before treatm.	yes	inh_BRAF_MEK
pre_005	before treatm.	yes	inh_BRAF
pre_006	before treatm.	yes	inh_BRAF
pre_007	before treatm.	yes	inh_BRAF
pre_008	before treatm.	yes	inh_BRAF
pre_009	before treatm.	yes	inh_BRAF
pre_010	before treatm.	yes	inh_BRAF
pre_011	before treatm.	yes	inh_BRAF
pre_012	before treatm.	yes	ab_CTLA4
pre_013	before treatm.	no	inh_BRAF
pre_014	before treatm.	yes	ab_CTLA4
pre_015	before treatm.	yes	ab_CTLA4
pre_016	before treatm.	yes	ab_CTLA4
pre_017	before treatm.	yes	ab_CTLA4
pre_018	before treatm.	yes	ab_CTLA4
pre_019	before treatm.	yes	inh_BRAF_MEK
pre_020	before treatm.	yes	inh_BRAF
pre_021	before treatm.	yes	inh_BRAF_MEK
pre_022	before treatm.	yes	inh_BRAF
pre_023	before treatm.	yes	inh_BRAF
pre_024	before treatm.	yes	inh_BRAF_MEK
pre_025	before treatm.	yes	ab_PD1
pre_026	before treatm.	yes	ab_PD1
pre_027	before treatm.	yes	ab_PD1
pre_028	before treatm.	yes	ab_PD1
pre_029	before treatm.	yes	inh_BRAF_MEK
pre_030	before treatm.	yes	inh_BRAF_MEK
pre_031	before treatm.	no	ab_PD1
pre_032	before treatm.	yes	inh_BRAF
pre_033	before treatm.	yes	ab_PD1
pre_034	before treatm.	yes	ab_PD1
pre_035	before treatm.	yes	ab_PD1
pre_036	before treatm.	yes	ab_PD1
pre_037	before treatm.	yes	inh_BRAF_MEK
pre_038	before treatm.	yes	inh_BRAF_MEK
pre_039	before treatm.	yes	ab_PD1
pre_040	before treatm.	yes	inh_BRAF_MEK
pre_041	before treatm.	yes	ab_PD1_CTLA4
pre_042	before treatm.	yes	ab_PD1
pre_043	before treatm.	yes	ab_PD1_CTLA4
trm_001	after treatm.	yes	inh_BRAF
trm_002	after treatm.	yes	inh_BRAF
trm_003	after treatm.	yes	inh_BRAF
trm_004	after treatm.	yes	inh_BRAF_MEK
trm_005	after treatm.	yes	inh_BRAF
trm_006	after treatm.	yes	inh_BRAF
trm_007	after treatm.	yes	inh_BRAF
trm_008	after treatm.	yes	inh_BRAF
trm_009	after treatm.	yes	inh_BRAF
trm_010	after treatm.	yes	inh_BRAF
trm_011	after treatm.	yes	inh_BRAF
trm_012	after treatm.	yes	ab_CTLA4
trm_014	after treatm.	yes	ab_CTLA4
trm_015	after treatm.	yes	ab_CTLA4
trm_016	after treatm.	yes	ab_CTLA4
trm_017	after treatm.	yes	ab_CTLA4
trm_018	after treatm.	yes	ab_CTLA4
trm_019	after treatm.	yes	inh_BRAF_MEK
trm_020	after treatm.	yes	inh_BRAF
trm_021	after treatm.	yes	inh_BRAF_MEK
trm_022	after treatm.	yes	inh_BRAF
trm_023	after treatm.	yes	inh_BRAF
trm_024	after treatm.	yes	inh_BRAF_MEK
trm_044	after treatm.	no	ab_PD1
trm_025	after treatm.	yes	ab_PD1
trm_026	after treatm.	yes	ab_PD1
trm_027	after treatm.	yes	ab_PD1
trm_045	after treatm.	no	ab_PD1
trm_028	after treatm.	yes	ab_PD1
trm_029	after treatm.	yes	inh_BRAF_MEK
trm_030	after treatm.	yes	inh_BRAF_MEK
trm_032	after treatm.	yes	inh_BRAF
trm_033	after treatm.	yes	ab_PD1
trm_034	after treatm.	yes	ab_PD1
trm_035	after treatm.	yes	ab_PD1
trm_036	after treatm.	yes	ab_PD1
trm_037	after treatm.	yes	inh_BRAF_MEK
trm_038	after treatm.	yes	inh_BRAF_MEK
trm_039	after treatm.	yes	ab_PD1
trm_040	after treatm.	yes	inh_BRAF_MEK
trm_041	after treatm.	yes	ab_PD1_CTLA4
trm_042	after treatm.	yes	ab_PD1
trm_043	after treatm.	yes	ab_PD1_CTLA4

## Sheet: 2. Quantification, NPX
NPX	101_IL-8	102_TNFRSF9	103_TIE2	105_CCL7	106_CD40-L	107_IL-1 alpha	108_CD244	109_EGF	110_ANG-1	111_IL-7	112_PlGF	113_IL-6	114_ADGRG1	115_CCL2	116_CRTAM	117_CXCL11	118_CCL13	120_TRAIL	121_FGF-2	122_CXCL9	123_CD8A	124_CA9	125_IFN-beta	126_ADA	127_CD4	128_NOS3	129_IL-2	130_Gal-9	131_VEGFR-2	132_CD40	133_IL-18	134_GZMH	135_VEGF-C	136_LAP TGF-beta-1	137_CXCL1	138_TNFSF14	139_IL-33	140_TWEAK	141_PDGF subunit B	142_PDCD1	143_FasL	144_CD28	145_CCL19	148_CCL8	149_CCL4	150_IL-35	151_Gal-1	152_PD-L1	153_CD27
pre_001	6.00225	5.21564	7.06124	1.15023	3.10074	NAN	5.658	5.41246	8.39105	4.61685	8.26493	3.46546	3.43	10.3489	4.19163	4.38454	5.36706	7.91984	-0.23434	7.21431	8.79223	2.80497	NAN	2.94224	-0.128271	NAN	NAN	7.27176	6.98717	10.2639	9.24605	4.1015	1.31454	1.42635	9.17921	3.59511	NAN	7.48486	10.0018	2.73576	5.88531	0.739901	9.06938	6.62818	6.81117	NAN	5.917	4.16099	7.25448
pre_002	8.12571	5.21197	7.03715	1.81048	3.5922	NAN	5.05411	6.2894	8.76183	4.58088	7.96896	4.30655	0.85428	11.3125	3.31988	6.78185	5.07613	7.65014	-0.167982	10.6527	8.86595	3.06717	NAN	2.0685	0.207087	NAN	1.60817	7.52688	6.68698	10.3865	7.49658	2.73136	1.1113	1.44454	9.04171	3.30929	NAN	8.0024	9.89366	2.26438	5.90987	0.558223	7.9799	8.21514	7.72298	NAN	6.07931	4.02376	7.12449
pre_003	9.09355	5.02475	7.83123	1.17161	3.09262	NAN	5.02669	5.62556	7.59408	3.7221	11.1902	7.47843	6.07965	10.3636	4.55686	4.22168	2.27749	6.74595	2.65399	6.97426	9.14948	3.39651	NAN	3.18245	0.249248	2.06712	NAN	7.33158	6.8685	10.3936	8.53345	4.04109	0.161109	2.4303	9.24939	5.88798	0.460888	6.26134	8.85572	2.74518	5.55413	0.969644	8.59636	5.67467	7.4325	0.449667	6.10679	4.53483	7.03114
pre_004	6.31237	5.4673	7.08521	0.843961	2.33698	NAN	5.33033	3.89402	6.32556	2.98506	7.8579	3.26461	1.75112	9.4487	4.26919	2.72251	3.7911	7.54334	-0.149827	7.0532	8.7299	2.82514	0.222441	2.88744	0.122562	NAN	NAN	6.7608	6.99983	10.156	7.05944	3.54815	-0.270889	1.24185	7.07394	2.60246	0.422107	8.18475	7.12158	2.2283	5.51666	0.673941	7.18061	6.01498	6.47405	NAN	6.40272	4.10166	6.90977
pre_005	6.4597	4.97499	6.99296	1.69569	2.60233	NAN	5.04709	4.42841	6.77409	4.07966	11.5121	6.06068	3.06127	9.52752	3.66051	4.76672	2.64199	7.82003	0.0177729	6.05614	10.2234	2.62948	0.293226	3.06242	0.0510565	1.07113	NAN	7.93849	6.80544	10.4277	8.62446	3.90885	-0.214639	1.85569	7.93734	4.1688	0.488844	7.18454	7.67675	1.64263	5.33417	0.932338	6.46538	6.09618	6.37203	NAN	6.49738	4.76273	7.53935
pre_006	5.33374	5.21033	7.03583	1.05555	2.43137	NAN	5.62661	4.42002	5.89181	2.78894	8.41498	6.08176	1.01017	10.1427	4.30947	4.08059	3.78464	7.40222	-0.279271	8.29326	8.62166	3.98264	0.616978	2.50781	0.175904	NAN	NAN	8.09793	6.94674	10.5995	9.91613	4.72421	-0.224727	1.39923	10.3673	4.21861	NAN	7.60717	7.20709	2.93593	5.82287	0.816357	8.64906	6.47949	7.27258	0.521774	6.05143	4.45722	7.52196
pre_007	6.45449	4.99544	7.85294	2.59463	2.1021	NAN	4.78833	3.61474	5.42153	3.90886	8.97223	7.23493	5.39618	10.5097	3.92724	3.94089	3.78611	7.24826	NAN	8.85206	7.97683	4.13276	NAN	3.76794	0.27439	1.12642	NAN	7.60559	6.7833	10.2091	8.02439	4.02253	-0.518707	1.76169	7.68598	5.65274	0.279716	7.28926	6.26435	2.36127	5.64506	0.599661	9.00926	6.02941	7.15474	NAN	6.59493	4.2988	7.42927
pre_008	5.60582	5.0592	6.99658	1.18045	2.39255	NAN	4.70421	3.68834	5.65275	2.96093	7.93286	2.45405	2.43038	8.84516	4.11102	3.79392	4.23691	7.73146	NAN	8.14916	8.14484	3.05625	NAN	2.6952	0.0122637	NAN	NAN	7.12146	6.77476	9.53192	8.33079	3.40697	0.0707496	1.37702	7.42734	2.40458	NAN	8.00289	7.42844	2.63165	5.02634	0.933124	8.73596	5.76109	6.26181	0.548932	6.03136	3.65019	7.29701
pre_009	7.36494	5.25092	6.95903	1.2503	3.11495	NAN	5.62808	4.87872	7.18603	3.43609	8.30087	5.32693	1.17294	11.466	3.92701	3.82927	4.8301	7.71806	-0.239205	7.32803	9.2028	2.21438	NAN	2.41818	-0.0400993	0.937495	NAN	6.67092	6.72671	10.057	9.03788	3.34899	-0.20202	1.21233	7.97441	4.18923	NAN	7.8311	8.29752	2.51174	5.31904	0.917545	8.48812	7.44302	10.4	0.39061	5.71662	3.81202	6.61626
pre_010	7.37929	5.22752	6.5906	1.19305	2.99426	NAN	5.12029	5.43397	8.68741	4.91606	8.14314	7.90702	1.19415	9.20503	3.47529	4.35877	5.33692	7.35922	0.084732	6.83744	8.39967	2.89175	NAN	2.22299	-0.153681	NAN	NAN	7.07188	6.6423	9.75141	8.08234	3.23319	0.721243	1.30385	9.56037	3.71198	NAN	8.09786	9.69157	2.37582	4.51374	0.530479	10.048	6.04346	6.60063	NAN	5.88133	3.71927	7.38735
pre_011	5.04032	3.57057	7.21283	0.490183	2.63969	NAN	4.55964	5.01044	5.9529	3.00857	7.59258	3.44949	0.365369	9.28088	3.48828	3.18506	3.17679	7.36476	NAN	6.35686	8.82312	2.31904	NAN	2.19342	-0.0811317	NAN	NAN	7.22624	7.05702	9.71352	8.03405	4.63271	-0.0297281	1.00781	6.68128	3.18631	NAN	7.28894	6.30592	0.936423	3.96486	NAN	6.0945	5.48852	6.24061	0.506139	5.45948	3.85777	6.49975
pre_012	6.84497	5.62497	7.02202	1.87856	3.4063	NAN	5.22891	5.49286	7.58221	3.93561	9.84202	6.94863	1.2523	10.2517	4.86473	3.43365	4.47361	7.35813	-0.0459031	8.07433	9.2509	2.85413	0.860151	4.70316	0.641732	NAN	NAN	7.53871	6.49243	10.7822	7.6438	4.50963	-0.303767	1.47948	8.96677	3.09259	NAN	7.66914	8.59598	1.99618	5.70634	0.373134	7.82024	6.22183	7.35518	0.438536	6.37226	4.34958	7.57894
pre_013	6.67785	5.30178	7.05055	1.6379	3.92392	NAN	5.2248	5.87725	8.24051	4.03145	8.27709	3.73117	1.67688	10.2602	4.58985	3.98431	5.76452	7.61451	0.623731	8.24322	9.4223	3.82854	0.534301	2.74205	-0.185224	0.996059	NAN	7.33326	6.95599	10.6171	8.99447	5.3657	3.253	1.64573	7.97099	3.58798	0.50115	8.94934	9.53105	2.74147	5.10724	0.795092	9.76404	6.34197	7.02929	0.386152	6.38668	4.1605	7.34391
pre_014	5.6463	4.82861	6.80183	0.810689	3.47044	NAN	5.25484	5.44843	8.68992	3.52675	8.11223	3.43308	1.06048	10.0876	4.51683	4.02433	5.22164	8.01291	-0.106926	7.1306	7.536	3.01341	NAN	2.85844	0.0312989	NAN	NAN	7.19609	7.08535	9.81663	8.25933	4.50809	1.29808	1.23545	6.94393	2.95381	NAN	7.99593	9.56858	2.6227	5.191	0.637578	7.78728	6.27242	7.18299	NAN	6.0539	4.23182	7.83856
pre_015	7.1191	6.22815	7.1542	2.06986	3.14722	NAN	5.7262	4.36711	6.68059	3.20006	9.11778	5.07572	2.29845	10.0332	3.98596	3.89141	5.65738	7.67025	0.212078	8.62119	9.49446	3.30371	1.79469	2.90675	0.588805	NAN	NAN	7.55393	6.92211	10.3699	8.6208	3.83661	-0.398173	1.33272	7.83317	3.42752	NAN	8.32022	8.37842	3.37757	5.72326	1.10759	9.47609	6.01522	7.08443	NAN	6.50777	5.31512	8.46527
pre_016	6.6358	4.68618	7.05137	2.12183	4.81879	NAN	5.30847	6.75701	9.78744	5.2027	7.87652	4.41824	2.00013	10.542	4.06089	4.67757	6.65624	7.04461	NAN	7.40367	9.04122	3.23736	0.199595	2.47529	-0.0889017	NAN	NAN	6.93415	6.97782	10.0513	7.56705	4.12054	2.48981	1.9323	8.92698	4.08221	0.370683	8.77219	10.6028	2.39413	5.97543	0.713545	8.25968	7.62816	7.71924	0.419076	6.02023	3.67014	6.65514
pre_017	8.92438	6.60269	8.02	1.73604	4.68179	NAN	5.34295	7.09811	8.64711	5.04047	9.75983	9.18908	2.20189	12.2214	4.88726	5.93363	6.07737	7.00076	0.577843	6.97095	9.30721	3.79691	1.02917	2.37888	1.08506	1.95473	NAN	7.43786	6.31435	11.3732	10.4098	4.57167	0.735264	1.77344	10.8452	6.2427	NAN	7.90887	10.2845	2.29055	5.64609	0.638975	11.7607	6.54624	7.16324	1.28271	6.55221	4.57377	8.17677
pre_018	4.54684	5.36368	7.19933	0.944948	3.19435	NAN	5.47856	4.74312	5.81502	3.35677	8.59033	2.98829	1.05665	9.95115	3.81845	4.19833	3.93808	7.61359	-0.12538	6.00144	9.21646	2.02748	0.416419	3.00261	-0.26337	0.756294	NAN	7.28158	7.23176	10.2638	8.18439	3.94177	0.404656	1.41857	7.13323	2.927	0.291908	8.54305	7.69407	2.98691	6.06637	0.844878	8.33667	6.0436	6.27204	1.03912	6.22855	4.09131	7.43519
pre_019	4.21966	4.46517	7.1712	0.633043	2.65525	NAN	5.25011	3.99045	5.96904	2.6298	8.13915	4.10095	1.00379	9.16824	3.94843	3.64469	4.32099	7.48088	-0.159126	6.22865	9.23729	3.42939	NAN	2.63644	-0.00302325	NAN	NAN	6.55631	6.62667	9.86076	7.68389	3.47886	-0.104247	1.25581	6.39385	2.68771	NAN	8.11175	7.73464	2.20158	5.38587	0.735382	7.59011	5.70053	6.17529	NAN	6.19572	3.6333	7.07493
pre_020	7.7623	6.53614	8.14446	1.79509	2.88046	NAN	5.59592	4.79483	6.23649	2.65068	11.4391	5.8023	5.59487	10.3971	4.12029	3.97361	3.17663	7.23623	NAN	6.6398	9.84654	2.64547	NAN	3.71062	0.421786	0.889935	NAN	7.69553	7.07844	11.0087	9.35375	4.05903	NAN	2.10276	7.45002	4.4387	NAN	7.72204	7.98575	2.74774	4.8898	0.414627	7.66584	5.18016	6.76094	NAN	6.20747	5.15653	7.62809
pre_021	4.75522	4.93584	6.99728	1.75167	3.22795	NAN	4.97142	5.42873	5.62101	2.75044	8.29188	4.53941	0.776157	9.83823	3.35561	4.98996	6.24035	7.65975	-0.051188	6.66119	9.02825	3.45579	0.239437	2.68973	0.0849841	NAN	NAN	7.10365	6.88657	10.3682	8.50752	3.50004	0.0270353	1.21698	6.73064	3.52454	NAN	8.021	7.90779	2.36556	5.89358	0.744907	10.093	6.51845	6.30272	NAN	5.93322	4.29378	7.20563
pre_022	4.3641	4.62771	6.93789	0.774578	1.81327	NAN	5.23632	4.8684	7.87358	3.26858	8.04249	2.65331	1.17228	8.50226	3.96069	3.26385	4.87988	7.6717	1.05071	6.37684	10.4756	3.17948	NAN	2.76608	0.0743328	0.86934	NAN	7.40639	6.47197	10.0619	9.39567	3.82323	0.30064	1.14433	6.74019	4.05059	NAN	8.04398	9.19371	3.01792	5.00862	0.237725	6.6756	5.27234	7.52949	0.686002	5.98167	4.33902	7.31707
pre_023	6.65212	6.7381	7.61816	3.2708	2.63375	NAN	6.3513	3.74077	4.69177	2.0449	8.78552	4.2734	1.09144	10.7085	5.84745	4.84339	6.02048	8.17289	-0.0478591	8.42567	10.7081	4.08849	NAN	2.63039	0.404693	NAN	NAN	7.76501	7.00459	11.0851	9.33793	5.5633	-0.287366	1.40545	6.67583	3.38716	NAN	8.43437	6.18913	3.85891	6.24134	1.46991	9.1016	7.54399	7.92257	0.372846	6.36667	5.0125	8.13481
pre_024	5.15702	6.35754	7.23896	1.3951	6.06941	NAN	6.64832	8.01946	6.89673	4.32732	8.48279	6.22921	1.64925	10.1168	5.6144	5.6058	7.01952	7.79272	1.4361	10.5758	10.5507	2.74078	NAN	2.60347	0.377203	NAN	NAN	7.93967	7.17415	11.3504	9.22675	4.57292	0.163889	1.69643	8.37012	4.2423	NAN	8.54555	9.82304	3.768	6.18911	1.89465	10.1331	7.23377	7.48098	0.448773	6.34967	4.9501	8.12539
pre_025	5.15687	5.30587	6.87402	1.08796	3.51865	NAN	5.74905	5.36195	5.49181	4.09589	8.06567	4.2399	0.991166	9.71297	4.53927	4.35073	5.14449	7.80536	-0.0251047	7.829	8.10751	4.93188	0.159915	2.39223	0.118491	NAN	NAN	7.3022	6.48455	10.2734	8.61625	4.24716	-0.203732	1.22198	7.98328	2.87885	NAN	8.05368	7.2968	2.7459	6.34822	1.14026	8.4048	6.2692	6.37053	0.461638	5.99307	3.57657	7.92963
pre_026	5.18193	5.4184	6.94233	0.885178	3.87935	NAN	5.30066	5.69492	6.56819	3.19117	8.05996	4.14537	0.973095	9.51998	4.18074	3.95361	5.35235	7.27856	-0.164046	6.4263	9.23688	2.28811	NAN	2.18745	0.401992	0.946699	NAN	7.23515	6.67775	10.0637	7.21426	3.85844	0.285867	0.930266	7.60943	3.17285	NAN	8.03559	8.58215	2.48712	5.59822	0.518413	9.71677	5.30063	6.29957	NAN	5.88317	4.49529	7.77344
pre_027	4.58221	5.15411	7.287	1.85506	2.85154	NAN	5.38286	4.87183	7.3532	3.68401	8.05572	2.69157	0.419809	9.58675	3.68339	4.65131	5.60528	7.64012	-0.232633	6.94442	8.52079	3.31814	NAN	2.1465	-0.389628	NAN	NAN	6.83438	6.85157	9.95797	8.39091	3.40508	0.512981	1.15697	8.47582	2.06655	NAN	8.20487	8.37752	2.50082	5.89406	0.7037	8.32736	6.48072	6.20291	NAN	6.03763	3.80205	7.54047
pre_028	7.71521	7.28762	7.10412	2.57528	4.83946	NAN	6.03101	6.86656	8.62917	5.27139	10.6941	6.15637	4.34374	10.4296	5.1045	7.02396	6.8984	7.94228	0.0463083	10.1308	9.79771	3.7323	NAN	2.75436	1.01346	0.963796	NAN	8.22142	6.85084	11.3417	8.89393	5.5549	1.02217	1.58119	8.89424	4.33273	0.206031	8.69948	10.3794	3.41293	5.94319	0.949183	11.2387	7.26782	7.91099	0.382889	6.63785	5.47314	8.30345
pre_029	8.97205	8.24768	7.3664	2.46523	3.58349	NAN	6.80657	5.4848	6.82134	4.21671	10.9783	5.99303	4.70915	10.4624	6.67638	8.69312	6.23998	7.66062	0.139863	9.88194	11.3842	5.96029	0.208494	4.6052	0.791529	0.81387	NAN	7.82643	6.80603	12.0177	9.66626	5.04058	-0.0529609	1.98123	8.93267	4.08599	NAN	8.10611	8.65643	5.74677	6.52913	1.83683	8.75803	7.42334	6.86717	0.996689	6.24604	5.59041	8.96005
pre_030	6.01809	5.40689	6.9907	1.02614	2.80737	NAN	5.50826	4.0092	6.55509	3.39939	8.63205	4.27873	1.39984	9.86659	3.93429	3.95203	4.1945	8.35871	NAN	6.92864	9.25911	2.8213	NAN	2.53679	0.548484	0.7923	NAN	6.9208	6.62132	10.0235	8.7739	3.97228	-0.129847	1.41957	7.3082	3.57595	NAN	7.74825	8.1198	3.3653	5.21487	0.650473	8.7928	6.01527	6.4961	NAN	5.81461	4.31407	7.37861
pre_031	4.53868	5.35741	7.00329	0.638613	3.03451	NAN	6.04301	5.06114	6.73588	3.39124	8.10502	4.33436	0.891177	9.32988	4.17858	3.43602	5.19953	7.88798	NAN	6.04848	9.79755	4.36035	NAN	2.61257	-0.138136	NAN	NAN	7.05373	7.07042	10.1216	8.34363	3.54727	0.178413	1.31249	7.63662	2.76925	0.200991	8.51049	8.48317	2.80821	6.36941	1.11155	8.73837	3.58266	6.21612	NAN	6.11188	3.98244	8.14261
pre_032	6.11665	4.37802	7.07131	1.58449	2.50977	NAN	5.57052	4.39905	6.61098	3.93736	8.64868	4.26805	1.65609	9.55692	4.13109	5.97086	4.30417	8.10221	0.527332	8.93303	8.14422	3.70656	0.338243	3.2007	0.143374	NAN	NAN	7.9893	6.99492	10.7874	10.1656	5.12668	-0.141537	1.60246	7.63176	3.88216	NAN	8.35222	7.90345	2.8811	5.90839	0.508208	7.75557	6.43047	7.10905	0.599983	6.15267	4.91832	7.25363
pre_033	4.4737	5.16218	7.13122	0.963011	2.62476	NAN	5.32254	3.34441	5.14419	3.02476	7.9328	4.32509	0.524963	9.71153	3.95063	3.2413	4.86567	7.40997	NAN	6.72357	9.03896	3.11229	1.30728	1.94193	-0.0173877	NAN	NAN	6.19616	6.57221	9.84779	7.832	3.49301	-0.178982	1.12971	6.27673	2.91728	NAN	8.31628	6.2207	2.26946	6.26466	0.722835	8.43972	5.7296	6.1743	0.499741	5.67759	3.52711	6.96987
pre_034	4.44648	4.41061	6.88447	0.609931	3.14114	NAN	5.25091	4.33893	6.54275	2.53485	7.81982	2.67167	0.989491	9.53046	3.91677	4.16167	4.67908	8.12694	-0.299061	6.88036	8.40994	2.39775	NAN	2.42228	-0.121187	1.65263	NAN	7.38814	7.13338	9.9593	8.13344	5.47181	0.100944	0.887213	6.02721	3.08117	NAN	7.92243	8.09781	1.67609	5.33378	1.03435	8.04229	6.24364	7.24289	0.435285	5.8502	3.88685	7.2117
pre_035	6.69994	6.31491	7.44561	2.65653	2.57687	NAN	5.96882	4.22331	6.48527	2.59896	8.62669	6.33806	2.4103	10.3581	4.74671	4.35701	7.06897	7.52069	NAN	9.29945	8.11845	4.76276	NAN	2.6541	0.720686	NAN	NAN	7.35543	6.77856	10.7021	8.39486	4.45288	-0.384079	1.5532	8.79715	3.14001	NAN	8.34463	8.11426	3.1192	5.93616	1.04554	9.52601	6.20402	6.98072	NAN	6.1658	4.37586	7.79666
pre_036	5.76505	5.88284	7.2971	2.04021	2.58859	NAN	6.01806	4.27762	7.27827	3.80314	8.68546	4.38608	4.18124	10.0996	4.93792	6.10931	6.38397	8.04416	NAN	8.28963	9.0974	4.10741	NAN	2.40673	0.810917	NAN	NAN	7.13577	6.47191	10.1673	8.62353	5.27396	0.0937149	1.16232	8.17839	2.14175	NAN	8.67907	8.66751	3.2998	5.87078	3.05135	8.72881	7.06197	6.90857	0.616223	6.12593	4.49684	7.84862
pre_037	8.96781	5.13786	6.93104	3.81951	5.74398	NAN	5.35747	8.54078	9.1424	5.90681	9.65681	6.55657	3.54505	10.9755	3.91407	6.44338	6.82561	7.78084	-0.0990977	6.5494	9.00777	3.00921	0.495664	3.81526	0.385102	0.986766	NAN	7.89371	6.89152	11.1723	8.0477	3.71066	1.22727	1.63254	10.2838	4.4213	NAN	8.30507	10.0395	1.59246	5.19763	2.52978	8.73599	6.4364	7.74836	NAN	6.40409	5.04041	8.17876
pre_038	5.91671	6.96496	7.17709	3.93235	3.38251	NAN	5.93829	5.16756	7.43536	4.44141	9.03701	4.25132	2.0431	11.2232	6.07039	8.46473	9.58544	8.22298	-0.0194934	11.6975	8.19066	3.49724	NAN	2.84092	0.972761	0.868463	NAN	8.45786	6.843	11.2751	9.24687	5.68906	0.481574	1.37816	9.5167	3.37529	NAN	8.71979	9.44219	4.94106	6.93115	1.52249	10.4326	8.51829	7.72421	NAN	6.46829	5.49558	8.49672
pre_039	5.02451	4.93508	7.04001	0.909264	3.55533	NAN	5.03918	5.39212	6.91876	3.19191	8.06114	5.45913	1.0578	9.58795	4.0034	4.03681	5.67919	7.12774	0.481895	6.89466	8.73183	2.81383	NAN	2.22094	0.213307	NAN	NAN	7.07647	6.73343	10.3443	8.64622	3.56352	-0.247111	1.14114	7.04574	2.98114	NAN	8.24374	8.927	2.05904	6.06914	0.388231	8.68884	5.96173	6.85204	NAN	5.84217	4.113	7.19723
pre_040	8.04505	6.63812	7.0645	2.19614	4.5348	NAN	6.09711	6.60812	8.79813	4.54153	9.58032	4.57782	2.84951	10.7636	5.46394	7.37569	7.55183	7.42495	0.0332584	10.5365	9.99315	2.59526	NAN	2.90066	0.696397	0.840675	NAN	7.31019	6.99181	11.1356	8.40289	4.84887	1.05717	1.65247	8.25402	3.3668	0.258454	8.52509	10.0357	3.81709	6.16145	0.982423	10.8814	7.11232	6.974	0.393815	6.32418	4.94275	8.44296
pre_041	6.21011	5.46169	7.18726	2.50754	5.31631	NAN	5.97206	7.38914	7.59138	4.26794	8.22884	4.13255	3.08898	10.3231	4.34843	6.18364	6.51578	8.04222	0.778947	8.32413	8.80289	3.2874	NAN	3.30607	0.250391	NAN	NAN	7.44931	6.9077	11.0249	7.84631	4.11767	0.331304	1.60215	9.11848	3.26656	NAN	8.45334	9.37915	2.62147	5.28638	0.908539	8.63637	4.70215	7.21664	NAN	6.18032	4.2092	7.28967
pre_042	4.55779	5.00414	7.10305	1.22994	2.92185	NAN	5.94599	4.3124	6.05523	4.00594	8.04684	3.84514	0.858508	9.46975	4.54269	5.26077	5.67534	7.73672	0.0030332	8.48178	10.6222	3.18283	NAN	2.14902	0.149406	NAN	NAN	7.35876	6.84781	10.5298	8.4464	4.57547	-0.0566114	1.17968	7.02588	2.86266	NAN	8.30468	7.71381	2.90914	5.5439	0.760791	9.03703	6.48355	6.15478	0.610571	6.03709	4.20201	8.00783
pre_043	4.14508	4.48337	6.94611	0.829624	2.02937	NAN	5.54444	3.21523	4.95843	1.94489	7.71878	2.45662	1.11315	8.97749	3.30323	2.93631	4.96642	7.78564	NAN	6.10142	8.85447	3.40692	NAN	1.83837	-0.244904	NAN	NAN	6.78624	6.77082	9.88411	8.87847	3.28659	NAN	0.726617	5.96592	2.32819	NAN	8.10818	6.62491	1.4662	5.50471	0.585241	10.0273	4.63044	6.0645	NAN	5.54232	6.04732	7.75798
trm_001	6.76242	5.31357	7.0476	1.04318	4.02161	NAN	6.00995	6.44027	6.49234	3.74056	8.49348	5.17482	3.3365	10.7371	4.57931	5.77116	5.50949	7.80699	0.293753	7.51613	9.66775	2.80004	NAN	3.01542	0.289401	1.21745	NAN	7.48248	6.8262	10.6601	10.6983	4.56574	0.0801846	1.36194	8.36027	3.66193	NAN	7.52865	8.60636	2.86677	6.32641	0.991691	9.34167	7.07795	7.96489	NAN	5.76968	4.64888	7.33077
trm_002	6.55474	8.01537	7.32974	2.87582	5.9646	NAN	6.28782	6.68865	8.26884	3.6495	9.41191	4.83076	0.978832	11.7525	6.27384	8.85187	7.88673	8.07203	0.321744	12.0051	11.662	3.65835	NAN	3.30822	0.845744	0.888845	NAN	8.47756	7.0634	12.0365	10.3664	7.58449	0.558438	1.95464	8.61565	4.54086	NAN	8.17985	10.012	4.6777	7.91654	1.74674	11.2361	8.69419	8.28287	0.595155	6.24077	6.59001	9.18476
trm_003	7.65619	5.3243	7.44294	0.678588	3.05305	NAN	5.57725	5.03135	5.6862	3.31157	8.55258	2.57097	4.81153	9.68747	4.94442	4.71159	4.04068	8.07174	1.79554	7.91901	9.51573	3.00777	NAN	2.76501	0.317828	NAN	NAN	7.27815	6.93759	10.4088	8.23073	3.55066	-0.362139	1.24021	7.73433	3.01239	NAN	8.73262	7.01967	2.96	6.44816	0.655032	8.41348	6.26166	8.11472	NAN	5.84864	4.82963	6.87009
trm_004	4.56513	5.11254	7.23141	1.93865	3.08766	NAN	6.02037	5.03282	6.41654	3.3777	8.1505	5.00197	0.810445	9.76964	4.15971	5.68844	5.17979	7.52855	0.114533	9.59501	9.28114	3.06029	NAN	2.99851	0.605314	NAN	NAN	7.55617	7.09671	11.2113	9.01816	4.12213	-0.205984	1.00923	7.7164	3.02696	NAN	9.03985	7.921	3.17135	6.27008	0.827625	8.64306	7.31569	6.35204	NAN	6.1258	4.63873	7.1254
trm_005	5.74373	5.89553	7.55438	1.37982	3.08503	NAN	6.23939	5.05505	7.23464	4.08992	8.95189	3.25603	1.65966	9.43533	5.29593	5.92376	4.67137	8.07161	NAN	8.65628	11.2627	3.0598	NAN	2.70411	0.642035	0.993198	NAN	7.90586	7.09318	10.8596	9.31915	6.35867	0.0194137	1.65554	8.69373	3.03497	NAN	8.4771	8.51442	3.66081	7.27481	1.17972	8.46582	6.3763	7.05796	NAN	6.30843	4.95454	7.86504
trm_006	5.95272	5.40891	7.49858	1.84552	3.53387	NAN	6.42834	6.15087	5.1216	3.10259	8.61172	3.79458	1.29538	10.0067	5.1657	4.91848	5.54601	7.98837	0.16205	8.83346	8.90446	3.63296	0.391871	2.94722	0.611833	1.42618	NAN	7.92443	7.27564	10.928	10.1653	5.2449	-0.25536	1.47918	10.1516	3.19806	0.217752	8.14601	7.52526	3.39144	6.35134	1.06293	8.41573	6.33841	7.5813	NAN	6.096	4.82312	7.51816
trm_007	6.07855	6.9323	8.23667	3.93859	3.61956	NAN	6.03236	4.97939	6.03145	3.70898	8.68102	5.29217	3.99814	11.1401	5.77124	7.56632	7.94474	8.0979	-0.0151207	11.0963	10.0582	3.05059	NAN	3.35037	1.20676	NAN	NAN	8.31069	7.13587	11.4015	10.4487	5.7941	-0.350698	1.38683	8.71716	4.61472	NAN	8.7017	7.88016	4.8426	8.16704	2.02893	10.3825	7.66538	8.0469	NAN	6.14838	5.3706	8.17475
trm_008	4.98489	4.55909	6.90393	1.12282	3.23486	NAN	5.0594	5.2555	7.10771	2.8025	8.1379	3.49736	2.53807	9.68248	4.24393	4.69469	5.87214	7.83848	NAN	7.89325	8.68376	3.09472	NAN	2.74465	-0.138294	NAN	NAN	7.06402	6.75569	9.65323	8.62171	3.76952	0.687615	1.30713	6.57382	2.50757	NAN	8.33029	9.60064	2.29103	5.23073	0.915425	8.32076	6.11552	6.71506	NAN	5.82561	3.97692	7.5817
trm_009	5.77154	5.4381	7.12108	1.6611	6.97407	NAN	6.27937	8.1881	7.9285	4.66069	8.33028	4.63468	0.999507	10.2152	4.36686	6.38094	7.07945	8.24419	1.57978	8.1739	9.78618	2.00569	NAN	2.8888	0.366855	NAN	NAN	6.94827	6.87486	11.3278	9.17849	4.21097	0.613248	1.42503	9.15174	4.29151	NAN	8.40071	9.8663	3.04232	5.77052	1.11525	9.92581	7.80162	7.37902	NAN	5.85356	4.39527	6.77922
trm_010	6.24944	5.57558	7.12461	1.98625	3.6698	NAN	5.51644	5.56985	7.79275	4.14805	7.9815	4.57013	1.26457	10.149	4.55573	6.77719	6.92075	8.36688	0.756306	9.88028	8.88641	2.98182	NAN	2.60113	0.653128	0.855563	NAN	7.68069	6.83598	10.1921	8.73099	4.05155	-0.0158484	1.24358	8.67777	3.32542	NAN	8.38555	9.29922	3.2253	5.77182	1.09586	9.74604	6.29931	7.30566	NAN	6.03481	4.00569	7.59634
trm_011	6.58862	4.25935	7.61308	0.956481	3.54007	NAN	5.53703	5.56236	5.9769	3.63622	8.11428	3.51433	1.26122	10.7071	4.70443	4.85088	5.04898	7.99771	0.197364	7.52205	9.93891	2.96567	NAN	2.71023	0.126543	NAN	NAN	7.4746	7.37081	10.3951	9.27226	5.68381	-0.339022	1.23072	7.89341	3.20936	NAN	8.24548	7.48149	2.12976	5.74356	0.519638	7.63564	6.46905	6.99191	0.829467	5.89125	4.42645	6.83204
trm_012	6.72371	4.56287	7.27333	1.48035	2.37827	NAN	5.41517	4.3552	7.33553	3.61854	10.847	4.33212	1.79847	9.44292	4.2491	2.86188	4.86691	7.2638	-0.0425281	5.83596	8.97593	3.75913	0.742047	5.33055	0.747586	NAN	NAN	7.75312	6.73015	11.0026	7.856	4.31014	-0.28374	1.58495	7.94208	2.8509	NAN	7.66718	8.2518	2.22026	4.78005	0.296847	5.76724	5.24468	7.2788	NAN	6.55163	4.7604	7.56639
trm_014	5.76173	5.07849	6.82151	1.18336	3.31922	NAN	5.36265	5.81651	8.7653	4.11125	8.17742	3.60642	0.692523	10.1867	4.668	5.10019	6.30483	8.01297	0.0413098	7.4241	7.78893	2.98788	NAN	2.91201	0.2226	NAN	NAN	7.16554	7.12146	9.92401	8.49935	4.55093	1.16224	1.31048	8.05419	2.92072	NAN	8.19394	9.82038	2.94525	5.40717	0.875695	8.26197	6.47256	7.35454	NAN	5.96432	4.37926	7.88877
trm_015	7.75876	6.51365	7.19001	2.1621	2.69563	NAN	5.54404	4.91249	7.97962	4.52713	9.21939	7.1225	2.89755	10.0911	4.26964	5.80722	5.42149	7.12181	0.274947	11.7676	10.3464	2.76551	1.67212	2.61821	1.04135	1.21088	NAN	7.70908	6.6391	11.163	9.46599	4.87401	-0.00528339	1.53274	9.3646	4.9488	NAN	7.96327	9.50258	3.58327	5.41332	1.32701	10.1886	6.21592	7.67861	NAN	6.26755	5.38073	8.5069
trm_016	7.36952	4.75788	7.11585	1.93646	3.83735	NAN	5.62922	6.8207	9.50027	5.21556	8.21908	3.64875	2.04331	10.5836	3.99866	5.00625	7.55613	7.42404	0.673344	7.82972	9.1141	3.43601	NAN	2.45229	0.0467013	NAN	NAN	6.82638	6.93324	10.2963	7.91631	4.55261	2.24802	2.07468	9.15281	3.73259	NAN	9.02097	10.5327	2.18569	5.98424	0.769301	8.70947	7.57725	7.43806	0.863533	6.14451	3.81162	6.92661
trm_017	7.80729	5.81524	7.68848	0.907831	3.54766	NAN	4.92979	5.72554	7.3077	3.99408	9.22349	7.57753	2.17824	11.2162	4.64933	4.8565	4.18152	6.07352	0.173006	5.87555	9.04878	3.33994	NAN	2.22177	0.703644	2.1486	NAN	7.08453	5.7555	10.9414	10.0986	4.25199	-0.0537083	1.48059	9.89848	5.53883	NAN	7.74242	8.84978	2.06148	4.56038	0.596554	10.9451	5.32889	6.28461	0.491012	6.47225	4.1975	7.84276
trm_018	4.43487	5.21147	7.01863	1.10743	3.10856	NAN	5.24443	4.57863	5.97309	3.14445	8.42124	4.99945	0.271773	9.51554	3.38988	4.52263	3.75461	7.67495	NAN	6.81465	9.11859	1.97942	NAN	2.67193	-0.0890225	NAN	NAN	7.10016	6.88789	10.1374	8.16953	3.72797	0.348712	1.2596	6.84728	3.66479	NAN	8.13997	7.97432	2.61741	5.87634	0.855991	9.35281	5.92881	6.34925	NAN	6.05892	4.08529	7.25787
trm_019	5.86597	4.31719	7.1577	1.10691	2.87808	NAN	5.39993	4.61522	7.47716	3.86808	8.01661	2.84359	0.686401	9.70837	3.99411	4.81783	5.38037	7.81448	-0.0436465	6.03588	9.52445	3.64533	NAN	2.27236	0.230921	NAN	NAN	6.66193	6.60452	9.97845	7.60386	3.5629	0.416357	1.2901	9.09738	2.31255	NAN	8.41515	9.03448	1.92124	5.52971	0.481356	7.58788	6.4926	6.79507	0.743198	6.15496	3.60762	7.05171
trm_020	4.46518	5.95384	7.52383	0.719215	2.13456	NAN	5.83665	3.20676	5.34684	2.87792	8.72004	2.20621	4.45922	9.17433	5.19452	4.32043	3.39306	7.59047	NAN	7.16657	9.3611	2.78499	NAN	2.98967	0.26034	0.892775	NAN	7.74226	7.08316	10.408	9.73237	4.37711	-0.395403	1.36765	6.966	2.12631	NAN	8.18028	5.74735	3.32537	5.82107	0.641955	7.25657	5.32158	6.4494	NAN	5.85447	4.66908	7.16354
trm_021	5.15082	4.7856	7.19316	1.6019	2.43037	NAN	5.5746	3.85645	4.4931	2.3854	8.33445	4.85232	0.877044	9.67101	4.25836	7.25399	5.20685	8.14536	-0.298913	7.99769	9.65987	3.88728	NAN	3.31888	0.406529	NAN	NAN	7.38957	7.01564	10.5127	9.7899	4.381	-0.478532	1.18948	7.11162	3.92794	NAN	8.09138	5.9157	2.5778	6.61412	1.06028	9.6191	7.36945	8.01237	0.993448	5.81358	5.10136	7.5145
trm_022	5.37661	4.98834	7.08907	1.60108	2.0126	NAN	5.34093	4.58965	7.52269	3.5031	8.01621	5.6944	0.924502	11.133	4.47304	5.41972	4.85257	8.09537	-0.0746754	9.29146	10.8398	3.07789	NAN	2.38428	0.189551	0.849386	NAN	7.93691	6.52628	10.3351	9.18835	4.72277	0.145048	1.33397	8.40222	3.56036	NAN	8.21663	8.84792	3.00854	5.53277	0.690357	7.68747	6.73761	8.3029	NAN	6.02086	4.68128	7.078
trm_023	6.32739	6.61642	7.73144	2.0437	2.46269	NAN	6.20733	3.33689	3.94214	2.90456	8.69566	4.19791	0.910317	10.851	5.74678	5.12417	5.82089	7.95995	NAN	8.10545	10.8034	3.76684	NAN	2.35421	0.426894	NAN	NAN	7.62556	6.96633	10.9376	9.5603	4.27111	-0.29415	1.44031	7.29734	3.3249	NAN	8.38133	5.21099	3.3862	6.31622	1.42042	8.93569	7.1407	8.38419	NAN	6.24039	4.81974	7.94486
trm_024	4.82471	6.18473	7.20055	1.41392	2.59653	NAN	6.15178	3.45853	5.07975	2.92431	8.34234	6.18792	1.17824	10.2837	5.50533	5.39533	6.12932	7.5433	NAN	10.4696	10.4436	2.61523	NAN	2.26495	0.343381	NAN	NAN	7.87731	7.01899	10.6161	9.46302	4.46007	-0.113904	1.41715	7.11036	4.15066	NAN	8.17372	6.95423	3.6242	6.0678	1.67992	9.9695	6.7118	7.44008	0.620476	6.14122	4.80674	7.93896
trm_044	6.69316	5.72631	6.45527	2.31077	4.49909	NAN	5.07193	6.75629	8.42449	4.99013	8.72703	5.32412	4.64632	10.2806	4.3438	5.90062	5.83435	7.47987	0.351232	10.0132	9.58245	2.72782	NAN	2.72085	0.152651	NAN	NAN	7.36712	6.72748	10.3838	7.65365	4.31478	0.517675	1.36655	9.70358	3.23498	NAN	7.66732	9.59671	3.57977	5.42191	0.723435	9.60825	7.11224	7.41597	NAN	6.64998	4.22118	7.38769
trm_025	5.97	5.90705	7.16099	1.09175	2.50386	NAN	6.08305	3.95437	6.71608	4.35015	8.32222	5.16173	1.6433	10.1372	5.16312	4.99214	5.70013	7.82765	-0.0230058	8.88765	8.77639	5.15655	0.180784	2.45918	0.359889	1.12245	NAN	7.45853	6.59942	10.4225	9.19982	5.33962	0.0717049	1.3615	8.27685	3.42282	NAN	8.19947	8.12609	4.07808	6.51319	1.21983	9.112	6.60866	6.61152	NAN	6.05348	3.9524	8.24907
trm_026	5.16087	5.91653	7.14191	0.886041	3.20645	NAN	5.42002	4.93019	6.83865	4.09443	8.33406	4.60846	0.878142	9.76752	4.88441	4.38509	5.73878	7.73892	-0.269255	7.14338	9.20271	2.67554	NAN	2.414	0.422306	NAN	NAN	7.41696	6.84415	10.1345	7.56462	4.08073	0.325475	1.15489	9.04909	3.33132	NAN	8.27734	8.64807	3.70215	6.03592	0.626107	10.0733	5.70774	6.80212	NAN	6.07822	4.943	8.10158
trm_027	4.36994	5.30804	7.40432	1.86669	2.64913	NAN	5.42554	4.37184	5.80313	2.62895	7.92903	2.88055	0.68352	9.64642	3.69269	3.77042	5.03714	7.47194	-0.221057	7.54776	8.62521	3.51029	NAN	2.44792	-0.168005	NAN	NAN	6.92837	6.93885	10.0226	8.46304	3.42492	0.228595	1.08945	7.73588	2.48345	NAN	8.14016	6.79595	3.72255	5.88964	0.925175	8.86625	6.19399	6.13953	NAN	6.00471	3.85866	7.65168
trm_045	5.76842	5.64066	6.79432	2.8862	3.85003	NAN	5.4208	6.01562	7.3556	3.75621	8.21056	5.16031	1.45334	10.3057	3.93339	4.03502	6.60989	7.76345	-0.316498	7.72436	9.20429	3.32317	0.334579	2.38365	0.491203	NAN	NAN	7.46382	6.87284	10.6168	8.37027	5.10641	0.042799	1.29512	7.83508	6.07332	NAN	8.11833	9.04043	2.82568	5.09121	0.727674	8.60134	6.32927	5.68484	0.663906	6.3403	3.92413	7.83131
trm_028	8.19539	7.73954	6.9483	3.71694	3.3907	NAN	5.7883	5.80056	7.46413	4.41833	10.5749	7.1652	3.91507	10.5091	5.37785	6.93611	5.54516	7.29148	0.105961	11.0696	9.76383	3.72801	NAN	3.00948	0.914538	1.46739	NAN	8.38141	6.59554	11.4125	8.98663	5.85169	0.0585893	1.3586	8.36648	4.52381	NAN	8.42855	9.50703	5.18333	5.97571	1.0841	11.339	6.78575	8.11427	NAN	6.46009	5.95204	8.44093
trm_029	5.2304	6.37421	6.98689	1.12036	2.33547	NAN	6.19326	3.64459	5.45617	2.76588	8.43752	3.94353	3.21246	9.30317	6.15194	5.84678	4.81355	7.53059	-0.0299878	8.56983	10.5806	5.73903	NAN	3.09052	-0.0625391	0.768201	NAN	7.33532	6.58415	10.6613	9.12569	4.51185	-0.303988	1.33116	6.75555	3.06154	NAN	8.60856	6.89679	4.18704	5.54202	1.34675	7.95619	6.45327	6.05612	NAN	5.79027	4.87653	8.20326
trm_030	6.13723	5.09228	7.24971	1.62522	9.02601	NAN	6.71122	10.6744	9.10017	6.26567	8.47862	6.72132	1.80815	9.71392	4.47973	7.82287	6.12157	7.56823	2.90026	7.94334	9.24911	2.97632	0.18343	3.54828	0.430542	NAN	NAN	7.21482	7.02015	12.3269	9.78421	4.75403	1.39817	2.48779	10.6885	5.48624	0.621565	8.65212	10.8221	3.36354	5.42678	0.862312	7.80299	7.29407	6.63792	0.463914	6.29835	5.54204	7.3241
trm_032	5.66698	4.57971	7.26924	1.81689	2.46582	NAN	5.75202	4.30466	6.81903	3.74391	8.48032	3.71255	1.36493	10.0746	4.01179	5.37521	4.37279	7.80434	0.263624	8.3714	8.75883	2.79019	0.479289	2.88204	-0.0596087	0.865584	NAN	8.02051	7.02844	10.6945	9.67676	5.0452	-0.162614	1.62617	7.94187	3.39665	NAN	8.27643	8.12972	2.64487	6.11662	0.62705	8.13749	6.43305	6.68949	0.647566	6.09514	4.56175	7.35692
trm_033	5.00442	5.74027	7.54249	1.12408	4.76564	NAN	5.73829	6.16746	6.41688	3.75704	8.17437	4.86797	0.881528	9.97942	4.36938	4.25341	5.3273	7.31841	-0.0852985	7.63184	9.68891	2.98292	1.18126	2.56451	0.299613	NAN	NAN	6.78015	6.82931	10.6121	8.39882	4.00155	-0.0235862	1.31767	8.29795	3.78779	NAN	8.14482	8.06013	3.6492	6.44961	1.01189	9.17253	6.33936	6.93677	NAN	6.12827	3.86426	7.44546
trm_034	5.01105	5.37803	7.09504	1.27176	5.13632	NAN	5.59873	6.71189	8.2203	4.06036	7.89254	2.69575	1.30307	9.6588	4.47068	5.46041	5.52257	7.90345	-0.098121	8.5976	8.77225	2.45924	NAN	2.51095	0.359447	1.07671	NAN	7.71836	7.25639	10.4731	8.45371	5.11687	0.935449	1.31108	8.08257	3.46252	NAN	8.39165	9.57763	3.94015	5.93338	1.31144	10.1757	6.81516	7.76855	NAN	6.07803	4.17199	7.49124
trm_035	7.21376	6.65237	7.67154	2.92583	2.97528	NAN	6.00055	4.92503	7.06702	3.39139	8.73651	7.52391	2.14429	10.7434	5.13332	5.38521	6.72572	7.62416	-0.0738864	10.6637	8.2637	4.34139	NAN	2.69887	0.886999	NAN	0.814729	7.56585	6.93393	10.8844	8.47034	4.61233	0.173036	1.66628	9.44754	3.68257	NAN	8.3959	8.44608	3.94419	6.21911	1.12014	10.2775	6.77708	8.08145	0.900262	6.37322	4.67994	7.95876
trm_036	6.04823	6.61372	7.52168	2.7743	3.07547	NAN	6.12379	6.36182	7.84942	4.26849	8.70131	6.15925	3.98192	10.7323	5.76892	7.46322	6.80046	9.30419	0.19962	11.1795	9.96377	3.61775	0.243141	3.34769	0.734257	1.05157	NAN	7.88005	6.57624	10.891	10.1857	6.5743	0.310536	1.51686	8.55031	3.21133	NAN	8.24083	9.52466	4.93084	5.93424	3.47233	10.0129	8.01832	8.1865	0.769296	6.15568	5.16627	8.20372
trm_037	7.48974	5.62966	6.76237	3.29534	4.22135	NAN	5.33255	5.37987	8.8708	4.27876	8.23935	6.35182	1.65015	11.3041	4.96552	5.77989	5.35907	8.02661	-0.191785	8.16594	9.22829	3.80403	0.453159	2.75717	0.134193	0.868116	NAN	8.08869	6.64639	10.451	9.4452	5.54389	1.06415	1.40573	8.7156	4.01038	NAN	8.90812	9.42445	2.95828	5.92774	2.16374	8.88795	7.13776	7.80365	NAN	5.99679	4.63717	7.83538
trm_038	5.24197	5.5065	6.95855	2.40871	7.13082	NAN	6.21967	9.01336	8.66389	5.31101	8.22846	3.06958	1.12699	9.62288	4.47232	7.76135	7.85671	7.67345	0.577594	11.7074	7.80683	3.4784	0.238733	3.07809	0.365329	NAN	NAN	8.24752	6.56866	11.6562	10.2766	5.5626	1.47295	1.77931	10.3938	3.81196	0.226685	8.43572	10.4632	3.90217	6.58752	1.37959	9.76994	8.0146	7.04615	0.429135	6.25243	5.20563	7.51018
trm_039	5.08623	4.84295	6.77155	0.594699	2.87909	NAN	4.86018	4.9666	6.57442	3.62869	7.79761	3.84773	0.896958	9.28478	3.993	2.64184	3.85565	7.16977	-0.187961	7.38127	8.21211	2.76086	NAN	1.97098	-0.172955	NAN	NAN	7.19598	6.52521	10.0915	8.24824	3.08411	-0.240578	1.10801	8.17329	2.21871	NAN	7.91571	7.68931	2.70461	5.81069	0.495811	8.24212	5.8626	6.9904	0.365996	5.73641	3.6548	6.95927
trm_040	5.48809	6.30409	7.35444	1.05088	2.9278	NAN	6.60074	4.43067	6.74228	3.68876	8.73451	4.97473	1.64186	9.61873	5.94802	5.4817	5.04426	7.81947	-0.203929	10.5513	9.49235	3.47955	NAN	3.65409	0.670995	0.818695	NAN	8.02428	7.14179	11.1196	11.0376	5.60302	0.110321	1.56924	8.18191	3.87661	NAN	8.47965	7.83388	3.95444	7.08879	1.50846	9.36359	6.63473	6.66556	0.433367	6.5659	5.24423	8.44608
trm_041	6.2118	6.53055	7.31068	1.90941	2.59031	1.20026	5.85703	3.32697	7.0802	3.61169	8.16677	5.4611	2.53757	10.8309	5.19157	5.75658	5.07423	7.91917	-0.29075	11.1058	8.62439	3.75652	NAN	3.46882	0.432403	NAN	NAN	8.01031	6.84648	10.6632	8.97505	5.06598	-0.151714	1.54585	8.12565	3.92137	NAN	7.80905	7.907	5.70289	5.9256	1.82149	10.659	4.53209	7.47102	NAN	6.0664	4.83995	7.76824
trm_042	4.5885	5.36063	6.95686	0.952385	2.24098	0.902962	5.54506	3.9745	6.70317	3.95908	7.92034	3.8831	0.799874	9.04365	4.41113	6.06283	4.86574	7.56537	0.10624	9.21368	11.1404	3.70424	NAN	2.25038	0.299209	NAN	NAN	7.95512	6.78986	10.5639	8.77641	4.81846	0.0234653	1.2932	7.441	3.10409	NAN	7.81545	7.96357	3.54092	5.34981	0.976801	8.90888	6.45982	6.26352	NAN	5.9033	4.37565	7.98031
trm_043	4.01821	4.8778	6.83058	0.667251	1.5627	NAN	5.35301	2.16289	4.58021	1.94826	7.57485	2.88501	0.707303	9.01669	3.43602	2.16343	3.38421	7.57237	NAN	6.72017	8.48136	3.08268	NAN	1.82872	-0.170788	0.95996	NAN	7.01697	6.7648	9.80527	8.71163	3.28915	-0.484793	0.882263	5.84867	2.41237	NAN	7.78108	5.30788	3.29739	5.41133	0.864956	10.379	4.6039	6.01333	NAN	5.64904	5.84603	7.83564
[truncated: 44 more columns]

## Sheet: 3. Quality Control
Quality Control:
	Samples excluded due to technical problems and quality controls:
	trm_046
	trm_031
	pre_046
	trm_013
	Samples partially excluded (values marked in blue):	Protein
	NA

## Sheet: 4. Protein identifiers
Number	Long Name	Short Name	Link Uniprot
101	Interleukin-8	IL-8	P10145
102	Tumor necrosis factor receptor superfamily member 9	TNFRSF9	Q07011
103	Angiopoietin-1 receptor	TIE2	Q02763
105	C-C motif chemokine 7	CCL7	P80098
106	CD40 ligand	CD40-L	P29965
107	Interleukin-1 alpha	IL-1 alpha	P01583
108	Natural killer cell receptor 2B4	CD244	Q9BZW8
109	Pro-epidermal growth factor	EGF	P01133
110	Angiopoietin-1	ANG-1	Q15389
111	Interleukin-7	IL-7	P13232
112	Placenta growth factor	PlGF	P49763
113	Interleukin-6	IL-6	P05231
114	Adhesion G-protein coupled receptor G1	ADGRG1	Q9Y653
115	C-C motif chemokine 2	CCL2	P13500
116	Cytotoxic and regulatory T-cell molecule	CRTAM	O95727
117	C-X-C motif chemokine 11	CXCL11	O14625
118	C-C motif chemokine 13	CCL13	Q99616
120	TNF-related apoptosis-inducing ligand	TRAIL	P50591
121	Fibroblast growth factor 2	FGF-2	P09038
122	C-X-C motif chemokine 9	CXCL9	Q07325
123	T-cell surface glycoprotein CD8 alpha chain	CD8A	P01732
124	Carbonic anhydrase 9	CA9	Q16790
125	Interferon beta	IFN-beta	P01574
126	Adenosine deaminase	ADA	P00813
127	T-cell surface glycoprotein CD4	CD4	P01730
128	Nitric oxide synthase, endothelial	NOS3	P29474
129	Interleukin-2	IL-2	P60568
130	Galectin-9	Gal-9	O00182
131	Vascular endothelial growth factor receptor 2	VEGFR-2	P35968
132	CD40L receptor	CD40	P25942
133	Interleukin-18	IL-18	Q14116
134	Granzyme H	GZMH	P20718
135	Vascular endothelial growth factor C	VEGF-C	P49767
136	Latency-associated peptide transforming growth factor beta-1	LAP TGF-beta-1	P01137
137	C-X-C motif chemokine 1	CXCL1	P09341
138	Tumor necrosis factor ligand superfamily member 14	TNFSF14	O43557
139	Interleukin-33	IL-33	O95760
140	Tumor necrosis factor ligand superfamily member 12	TWEAK	O43508
141	Platelet-derived growth factor subunit B	PDGF subunit B	P01127
142	Programmed cell death protein 1	PDCD1	Q15116
143	Fas antigen ligand	FasL	P48023
144	T-cell-specific surface glycoprotein CD28	CD28	P10747
145	C-C motif chemokine 19	CCL19	Q99731
148	C-C motif chemokine 8	CCL8	P80075
149	C-C motif chemokine 4	CCL4	P13236
150	Interleukin-35	IL-35	Q14213 + P29459
151	Galectin-1	Gal-1	P09382
152	Programmed cell death 1 ligand 1	PD-L1	Q9NZQ7
153	CD27 antigen	CD27	P26842
154	C-X-C motif chemokine 5	CXCL5	P42830
155	Interleukin-5 (IL-5)	IL-5	P05113
156	Hepatocyte growth factor	HGF	P14210
157	Granzyme A	GZMA	P12544
158	Heme oxygenase 1	HO-1	P09601
159	Fractalkine	CX3CL1	P78423
160	C-X-C motif chemokine 10	CXCL10	P02778
161	CD70 antigen	CD70	P32970
162	Interleukin-10	IL-10	P22301
163	Tumor necrosis factor receptor superfamily member 12A	TNFRSF12A	Q9NP84
164	C-C motif chemokine 23	CCL23	P55773
165	T-cell surface glycoprotein CD5	CD5	P06127
166	C-C motif chemokine 3	CCL3	P10147
167	Matrix metalloproteinase-7	MMP7	P09237
168	Arginase-1	ARG-1	P05089
169	Natural cytotoxicity triggering receptor	NCR1	O76036
170	Decorin	DCN	P07585
171	Tumor necrosis factor receptor superfamily member 21	TNFRSF21	O75509
172	Tumor necrosis factor receptor superfamily member 4	TNFRSF4	P43489
173	MHC class I polypeptide-related sequence A/B	MIC-A/B	Q29983,Q29980
174	C-C motif chemokine 17	CCL17	Q92583
175	Angiopoietin-2	ANG-2	O15123
176	Pleiotrophin	PTN	P21246
177	Stromal cell-derived factor 1	SDF-1	P48061
178	Interferon gamma	IFN-gamma	P01579
179	Lysosome-associated membrane glycoprotein 3	LAMP-3	Q9UQV4
180	Caspase-8	CASP-8	Q14790
181	ICOS ligand	ICOSLG	O75144
182	Macrophage metalloproteinase-12	MMP-12	P39900
183	C-X-C motif chemokine 13	CXCL13	O43927
184	Programmed cell death 1 ligand 2	PD-L2	Q9BQ51
185	Vascular endothelial growth factor A	VEGF-A	P15692
186	Interleukin-4	IL-4	P05112
187	Interleukin-21	IL-21	Q9HBE4
188	Interleukin-12 receptor subunit beta-1	IL12RB1	P42701
189	Interleukin-13	IL-13	P35225
190	C-C motif chemokine 20	CCL20	P78556
191	Tumor necrosis factor	TNF	P01375
192	Natural killer cells antigen CD94	KLRD1	Q13241
193	Granzyme B	GZMB	P10144
194	CD83 antigen	CD83	Q01151
195	Interleukin-12	IL-12	P29459+P29460
196	Macrophage colony-stimulating factor 1	CSF-1	P09603
